# Supplementary material
Source: publisher site journal article supplement (https://www.dovepress.com/article/562164)
Supplement: Supplementary file 1 [file 562164%20Supplementary%20Material.docx]

**Fundamentals**

*ICD-/OPS-Codes and further Information*

**Overview of information sources:** A more detailed population description inclusion and exclusion criteria, as well as all ICD. OPS and ATC codes used for all influencing variables and all endpoints can be found in the Short Study Protocol in the supplements by Katthagen at al.[1] Coding of the geriatrics-typical characteristic complexes (GtMk) was based on the ‘Abgrenzungskriterien der Geriatrie V1.3’ [2,3]. The following table contains the complete overview of the GtMk codes used. Data collection was based on outpatient and inpatient information in the period of two years before the index event (i.e. the first coded proximal humeral fracture [PHF] diagnosis, ICD S42.2), which was coded as the main or second diagnosis. Deviating or supplementary comments are marked in the table and explained in the footnotes.

Table S1: ICD- and OPS-Codes for the surgical interventions and Geriatric-typical characteristic complexes.

| **Surgical interventions** | | |
| --- | --- | --- |
| Stable-angle plate osteosynthesis for multi-fragmented fracture (LPF) | OPS | 5-794.21, 5-794.k1 |
| Stable-angle plate osteosynthesis for single fragment fracture (sLPF) | OPS | 5-793.k1, 5-793.31 |
| Reverse total shoulder arthroplasty (RTSA) | OPS | 5-824.21 |
| Other fracture fixation | OPS | 5-790.01, 5-790.11, 5-790.21, 5-790.31, 5-790.41, 5-790.51, 5-790.61, 5-790.71, 5-790.81, 5-790.91, 5-790.d1, 5-790.m1, 5-790.n1, 5-790.p1, 5-790.x1, 5-793.11, 5-793.21, 5-793.41, 5-793.51, 5-793.61, 5-793.71, 5-793.81, 5-793.91, 5-793.a1, 5-793.b1, 5-793.c1, 5-793.g1, 5-793.m1, 5-793.n1, 5-793.x1, 5-794.01, 5-794.11,5-794.31, 5-794.41, 5-794.51, 5-794.61, 5-794.71, 5-794.81, 5-794.a1, 5-794.b1, 5-794.c1, 5-794.g1, 5-794.m1, 5-794.n1, 5-794.x1, 5-824.00, 5-824.01, 5-824.0x, 5-824.20 |
| **Geriatrics-typical characteristic complexes (GTMM)** | | |
| Immobility | ICD | M96.8, M62.3, M62.5 |
| Propensity for falls | ICD | H81, H82, R26, R29.81, R42 |
| Cognitive deficits | ICD | F00, F01, F02, F04, F05, F067, F07 |
| Incontinence | ICD | N39.3, N39.4, R15, R32 |
| Decubital ulcers | ICD | I830, I832, L89, L97, L984 |
| Malnutrition and malnourishment | ICD | E41, E43, E44, R64 |
| Fluids and electrolytes disorders | ICD | E86, E87, R60 |
| Depression and anxiety disorders | ICD | F30, F31, F32, F33, F40, F41 |
| Pain | ICD | *Acute pain*  F45.40*[[1]](#footnote-1)*, H57.1a, H92.0a, K08.88a, K14.6a, M25.51a, M54a, N23a, N64.4a, R07.1a, R07.2a, R07.3a, R07.4a, R10a, R51a, R52.0a, R52.9a  *Chronic pain*  F62.80, R52.1, R52.2 |
| Sensory disorders | ICD | G50-G59, G60-G64, R20 |
| Frailty | ICD | R54 |
| Severe visual and hearing impairment | ICD | H25, H28, H52.4, H53, H54, H90, H91 |
| Medication problems | ICD | X49.9, Y57.9 (in combination with T36-T50) |
| High risk of complications | ICD | I48, S02[[2]](#footnote-2), S12b, S22b, S32b, S42b, S52b, S62b, S72b, S72b, S92b, T79-T89, Z43, Z48, Z98,  Z99.2 (dialysis requirement) |
| OPS | 8-853[[3]](#footnote-3), 8-854c, 8-855c, 8-857c |
| Delayed convalescence | ICD | Z54 |


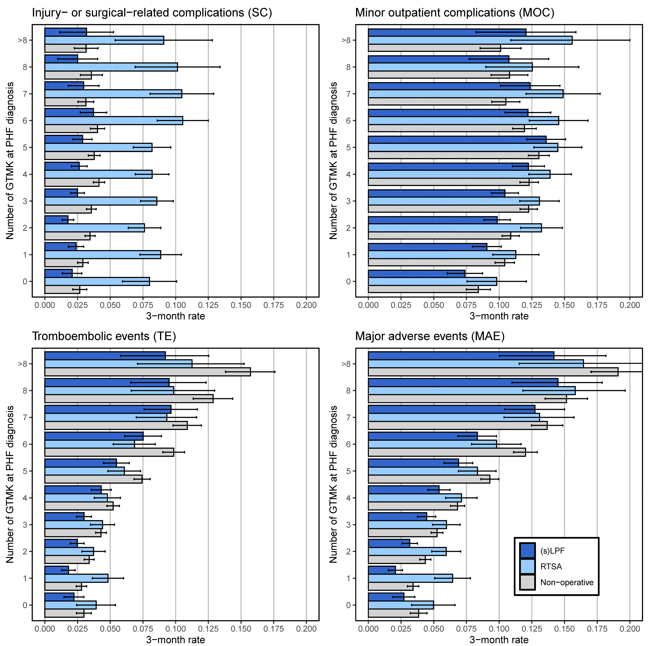
Figure S1: 3-month rates with 95% confidence interval determined using Kaplan-Meier estimates of the primary endpoints (SC, MOC, MAE, TE) depending on the number of GTMK present at the time of PHF diagnosis for the subgroups of sLPF & LPF (dark blue), RTSA (light blue) and non-surgical treatment (light gray). (s)LPF – locked plate fixation for simple and multi-fragment fracture, RTSA –reverse total shoulder arthroplasty

Table S2: 3-month rates with 95% confidence interval (95%-CI) determined using Kaplan-Meier estimates of the primary endpoints (Mortality, SC, MOC, MAE, TE) depending on the number of GTMK present at the time of PHF diagnosis for the subgroups of (s)LPF, RTSA and non-surgical treatment. For a visualisation see Figure 2 or Figure S1. (s)LPF – locked plate fixation for simple and multi-fragment fracture, RTSA –reverse total shoulder arthroplasty

|  | | (s)LPF | RTSA | Non-operative |
| --- | --- | --- | --- | --- |
| Mortality | | | | |
| No GTMK | Events | 19 | 16 | 77 |
| Rate (95%-CI) | 1.32% (0.73%, 1.91%) | 2.42% (1.24%, 3.58%) | 2.21% (1.72%, 2.70%) |
| 1 GTMK | Events | 27 | 31 | 130 |
| Rate (95%-CI) | 1.04% (0.65%, 1.43%) | 2.50% (1.63%, 3.36%) | 1.97% (1.63%, 2.30%) |
| 2 GTMK | Events | 60 | 43 | 231 |
| Rate (95%-CI) | 1.79% (1.34%, 2.24%) | 2.46% (1.73%, 3.19%) | 2.66% (2.32%, 3.00%) |
| 3 GTMK | Events | 70 | 60 | 305 |
| Rate (95%-CI) | 2.05% (1.58%, 2.53%) | 3.12% (2.34%, 3.89%) | 3.26% (2.90%, 3.61%) |
| 4 GTMK | Events | 78 | 57 | 338 |
| Rate (95%-CI) | 2.85% (2.22%, 3.47%) | 3.25% (2.41%, 4.07%) | 4.07% (3.64%, 4.49%) |
| 5 GTMK | Events | 84 | 50 | 425 |
| Rate (95%-CI) | 4.11% (3.24%, 4.96%) | 3.53% (2.57%, 4.49%) | 6.22% (5.65%, 6.79%) |
| 6 GTMK | Events | 79 | 52 | 391 |
| Rate (95%-CI) | 5.88% (4.61%, 7.13%) | 5.48% (4.02%, 6.92%) | 7.91% (7.15%, 8.66%) |
| 7 GTMK | Events | 61 | 41 | 293 |
| Rate (95%-CI) | 7.54% (5.71%, 9.35%) | 6.71% (4.70%, 8.67%) | 9.28% (8.26%, 10.28%) |
| 8 GTMK | Events | 32 | 26 | 197 |
| Rate (95%-CI) | 8.00% (5.30%, 10.62%) | 7.76% (4.85%, 10.58%) | 10.47% (9.08%, 11.85%) |
| 9 and more | Events | 25 | 22 | 196 |
| Rate (95%-CI) | 8.87% (5.49%, 12.12%) | 9.52% (5.66%, 13.23%) | 13.76% (11.95%, 15.53%) |
| Injury- or surgical-related complications | | | | |
| No GTMK | Events | 30 | 53 | 93 |
| Rate (95%-CI) | 2.09% (1.35%, 2.83%) | 8.01% (5.93%, 10.08%) | 2.67% (2.13%, 3.21%) |
| 1 GTMK | Events | 62 | 110 | 192 |
| Rate (95%-CI) | 2.38% (1.80%, 2.97%) | 8.86% (7.28%, 10.44%) | 2.91% (2.50%, 3.31%) |
| 2 GTMK | Events | 59 | 133 | 300 |
| Rate (95%-CI) | 1.76% (1.32%, 2.21%) | 7.62% (6.38%, 8.87%) | 3.46% (3.07%, 3.84%) |
| 3 GTMK | Events | 85 | 165 | 333 |
| Rate (95%-CI) | 2.49% (1.97%, 3.02%) | 8.57% (7.32%, 9.82%) | 3.55% (3.18%, 3.93%) |
| 4 GTMK | Events | 72 | 144 | 344 |
| Rate (95%-CI) | 2.63% (2.03%, 3.23%) | 8.20% (6.92%, 9.49%) | 4.14% (3.71%, 4.57%) |
| 5 GTMK | Events | 59 | 116 | 258 |
| Rate (95%-CI) | 2.89% (2.16%, 3.61%) | 8.20% (6.77%, 9.63%) | 3.78% (3.32%, 4.23%) |
| 6 GTMK | Events | 50 | 100 | 199 |
| Rate (95%-CI) | 3.72% (2.71%, 4.73%) | 10.54% (8.59%, 12.50%) | 4.03% (3.48%, 4.57%) |
| 7 GTMK | Events | 24 | 64 | 99 |
| Rate (95%-CI) | 2.97% (1.80%, 4.14%) | 10.47% (8.04%.,12.91%) | 3.13% (2.53%, 3.74%) |
| 8 GTMK | Events | 10 | 34 | 67 |
| Rate (95%-CI) | 2.50% (0.97%, 4.03%) | 10.15% (6.91%.,13.39%) | 3.56% (2.72%, 4.40%) |
| 9 and more | Events | 9 | 21 | 45 |
| Rate (95%-CI) | 3.19% (1.13%, 5.25%) | 9.09% (5.37%, 12.81%) | 3.53% (3.37%, 3.68%) |
| Minor outpatient complications (MOC) | | | | |
| No GTMK | Events | 106 | 65 | 293 |
| Rate (95%-CI) | 7.38% (6.03%, 8.74%) | 9.82% (7.55%, 12.09%) | 8.41% (7.49%, 9.34%) |
| 1 GTMK | Events | 236 | 140 | 689 |
| Rate (95%-CI) | 9.06% (7.96%,10.17%) | 11.28% (9.52%, 13.04%) | 10.43% (9.69%, 11.17%) |
| 2 GTMK | Events | 330 | 231 | 945 |
| Rate (95%-CI) | 9.85% (8.84%, 10.86%) | 13.24% (11.65%, 14.83%) | 10.89% (10.23%, 11.54%) |
| 3 GTMK | Events | 356 | 252 | 1149 |
| Rate (95%-CI) | 10.45% (9.42%, 11.48%) | 13.08% (11.58%, 14.59%) | 12.26% (11.60%, 12.93%) |
| 4 GTMK | Events | 335 | 244 | 1021 |
| Rate (95%-CI) | 12.24% (11.01%, 13.47%) | 13.90% (12.28%, 15.52%) | 12.30% (11.59%, 13.01%) |
| 5 GTMK | Events | 278 | 205 | 891 |
| Rate (95%-CI) | 13.59% (12.11%, 15.08%) | 14.49% (12.65%, 16.33%) | 13.04% (12.24%, 13.84%) |
| 6 GTMK | Events | 164 | 138 | 590 |
| Rate (95%-CI) | 12.20% (10.45%, 13.95%) | 14.55% (12.30%, 16.80%) | 11.94% (11.03%, 12.84%) |
| 7 GTMK | Events | 100 | 91 | 332 |
| Rate (95%-CI) | 12.37% (10.10%, 14.64%) | 14.89% (12.06%, 17.72%) | 10.51% (9.44%, 11.58%) |
| 8 GTMK | Events | 43 | 42 | 203 |
| Rate (95%-CI) | 10.75% (7.71%, 13.79%) | 12.54% (8.98%, 16.09%) | 10.79% (9.39%, 12.20%) |
| 9 and more | Events | 34 | 36 | 144 |
| Rate (95%-CI) | 12.06% (8.25%, 15.87%) | 15.58% (10.89%, 20.28%) | 10.11% (8.54%, 11.68%) |
| Major adverse events (MAE) | | | | |
| No GTMK | Events | 39 | 33 | 134 |
| Rate (95%-CI) | 2.72% (1.87%, 3.55%) | 4.98% (3.31%, 6.63%) | 3.85% (3.21%, 4.48%) |
| 1 GTMK | Events | 54 | 80 | 226 |
| Rate (95%-CI) | 2.07% (1.53%, 2.62%) | 6.44% (5.07%, 7.80%) | 3.42% (2.98%, 3.86%) |
| 2 GTMK | Events | 106 | 104 | 378 |
| Rate (95%-CI) | 3.16% (2.57%, 3.76%) | 5.96% (4.84%, 7.06%) | 4.35% (3.92%, 4.78%) |
| 3 GTMK | Events | 152 | 115 | 492 |
| Rate (95%-CI) | 4.46% (3.76%, 5.15%) | 5.97% (4.91%, 7.02%) | 5.25% (4.80%, 5.70%) |
| 4 GTMK | Events | 148 | 125 | 567 |
| Rate (95%-CI) | 5.41% (4.56%, 6.25%) | 7.12% (5.91%, 8.31%) | 6.82% (6.28%, 7.36%) |
| 5 GTMK | Events | 141 | 118 | 635 |
| Rate (95%-CI) | 6.90% (5.79%, 7.99%) | 8.34% (6.89%, 9.77%) | 9.29% (8.60%, 9.98%) |
| 6 GTMK | Events | 112 | 93 | 594 |
| Rate (95%-CI) | 8.33% (6.84%, 9.80%) | 9.81% (7.89%.,11.68%) | 12.02% (11.11%, 12.92%) |
| 7 GTMK | Events | 103 | 80 | 432 |
| Rate (95%-CI) | 12.74% (10.41%, 15.01%) | 13.09% (10.37%, 15.72%) | 13.68% (12.47%, 14.87%) |
| 8 GTMK | Events | 58 | 53 | 285 |
| Rate (95%-CI) | 14.50% (10.98%, 17.88%) | 15.82% (11.82%, 19.64%) | 15.15% (13.52%, 16.76%) |
| 9 and more | Events | 40 | 38 | 272 |
| Rate (95%-CI) | 14.18% (10.01%, 18.16%) | 16.45% (11.53%, 21.10%) | 19.09% (17.03%, 21.11%) |
| Thromboembolic events (TE) | | | | |
| No GTMK | Events | 32 | 26 | 104 |
| Rate (95%-CI) | 2.23% (1.46%, 2.99%) | 3.93% (2.44%, 5.40%) | 2.99% (2.42%, 3.55%) |
| 1 GTMK | Events | 47 | 60 | 185 |
| Rate (95%-CI) | 1.81% (1.29%, 2.32%) | 4.83% (3.63%, 6.02%) | 2.80% (2.40%, 3.20%) |
| 2 GTMK | Events | 83 | 65 | 294 |
| Rate (95%-CI) | 2.48% (1.95%, 3.00%) | 3.72% (2.83%, 4.61%) | 3.39% (3.01%, 3.77%) |
| 3 GTMK | Events | 102 | 85 | 402 |
| Rate (95%-CI) | 2.99% (2.42%, 3.56%) | 4.41% (3.49%, 5.33%) | 4.29% (3.88%, 4.70%) |
| 4 GTMK | Events | 118 | 84 | 434 |
| Rate (95%-CI) | 4.31% (3.55%, 5.07%) | 4.78% (3.78%, 5.78%) | 5.22% (4.74%, 5.70%) |
| 5 GTMK | Events | 112 | 86 | 508 |
| Rate (95%-CI) | 5.48% (4.49%, 6.46%) | 6.08% (4.82%, 7.31%) | 7.43% (6.81%, 8.05%) |
| 6 GTMK | Events | 101 | 65 | 487 |
| Rate (95%-CI) | 7.51% (6.09%, 8.91%) | 6.85% (5.23%, 8.45%) | 9.85% (9.02%, 10.68%) |
| 7 GTMK | Events | 78 | 57 | 344 |
| Rate (95%-CI) | 9.65% (7.59%, 11.66%) | 9.33% (6.99%, 11.60%) | 10.89% (9.80%, 11.97%) |
| 8 GTMK | Events | 38 | 33 | 242 |
| Rate (95%-CI) | 9.50% (6.58%, 12.33%) | 9.85% (6.60%, 12.99%) | 12.87% (11.34%, 14.37%) |
| 9 and more | Events | 26 | 26 | 224 |
| Rate (95%-CI) | 9.22% (5.78%, 12.53%) | 11.26% (7.08%, 15.24%) | 15.72% (13.81%, 17.59%) |

Figure S2: Influence of the number of GTMK present at the time of PHF on the risk of experiencing a primary event within the first 3 months of observation. Adjustment for the patients’ risk profile was done using multivariable Cox regression. The presented hazard ratios (HR) are thus independent from the treatment group.


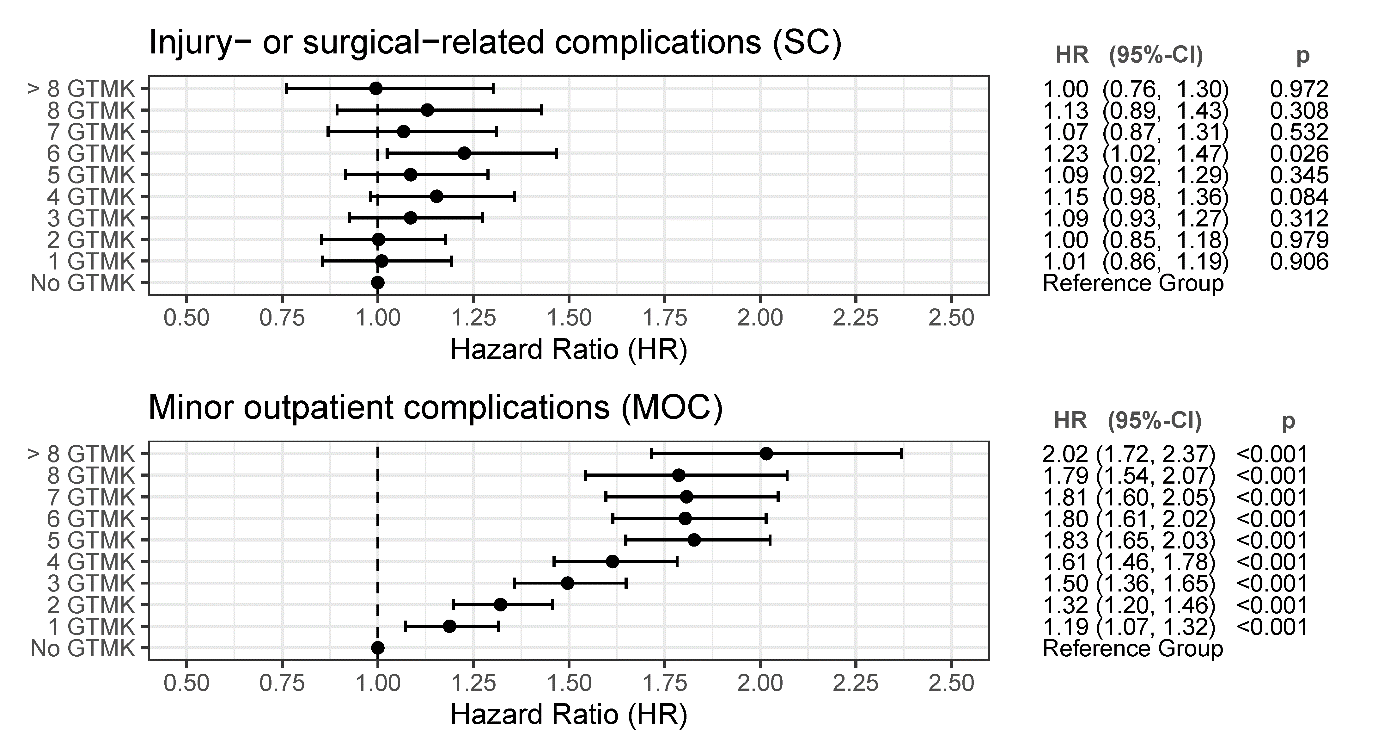


Figure S3: Influence of the individual GTMK on Major Adverse Events with adjustment for the patient risk profile. The influence was assessed for the subgroups of non-surgical (light gray), surgical (dark gray), and for the overall cohort (black diamond). The interaction p-values () are calculated using a Cox regression model that includes interaction terms for the individual GTMK and the binary operation variable and quantify the difference in GTMK influence between the non-operative and operative subgroups. Full regression results are presented in Table S7.


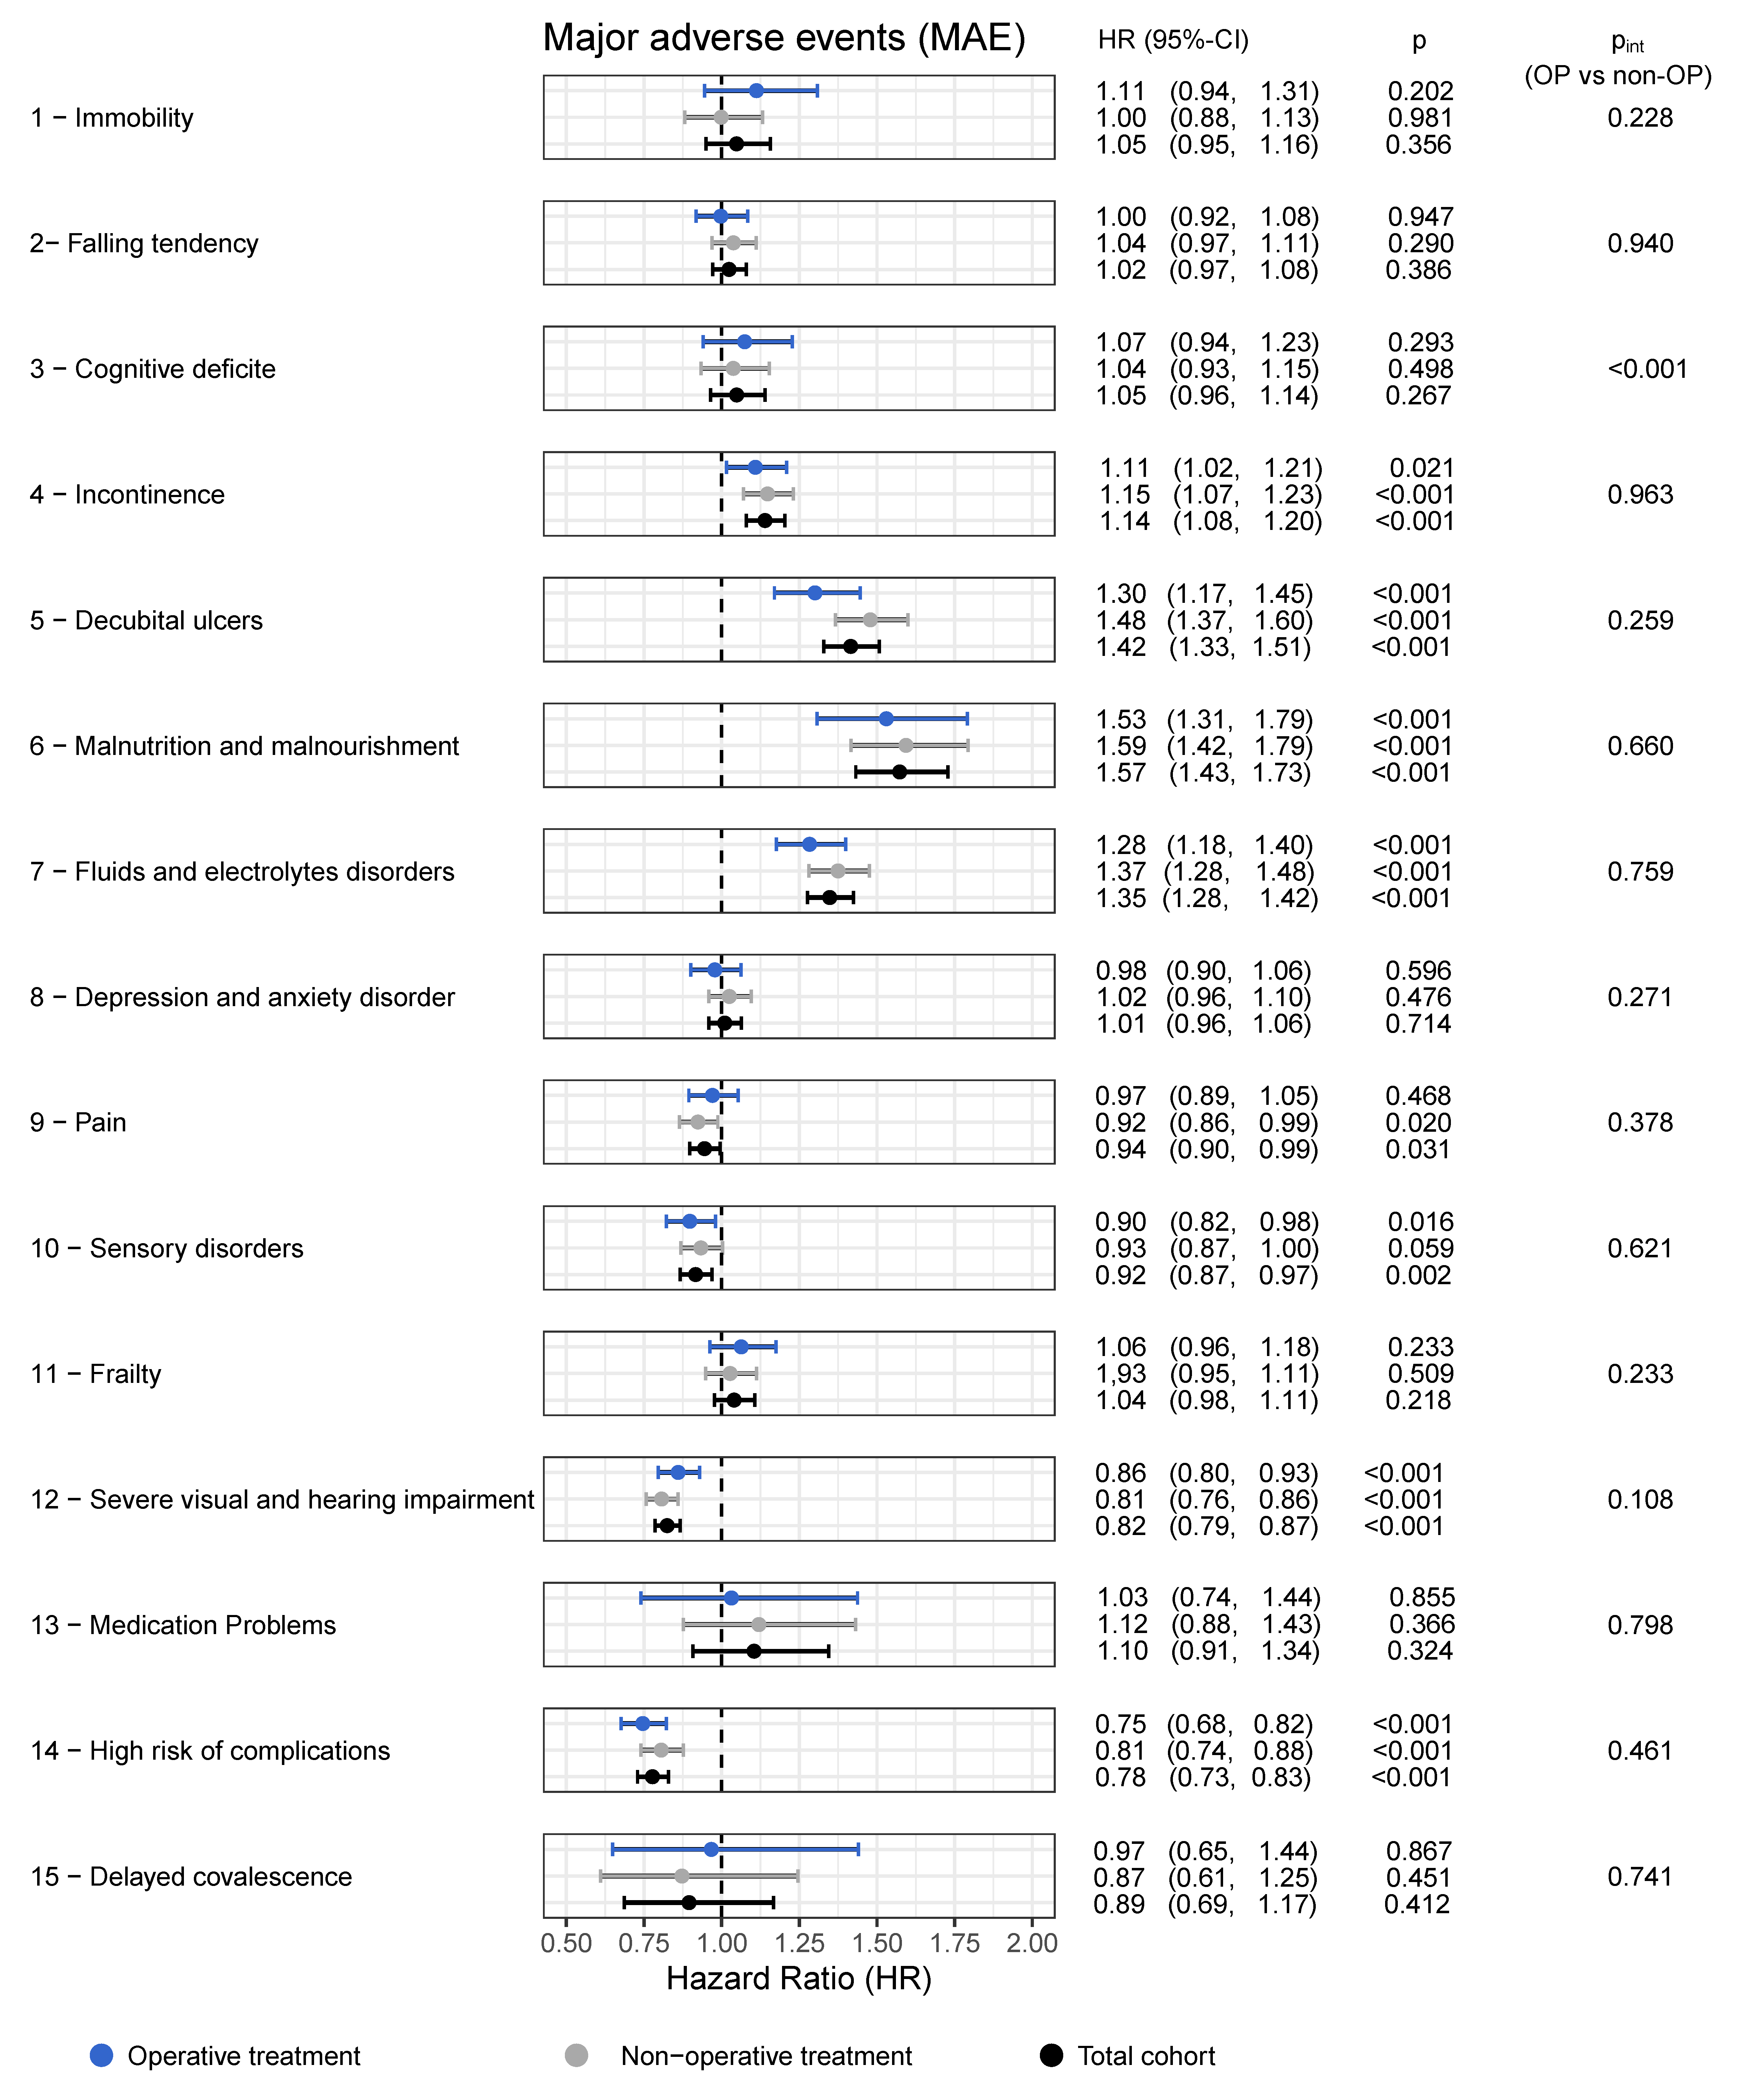


Figure S4: Influence of the individual GTMK on Thromboembolic Events with adjustment for the patient risk profile. The influence was assessed for the subgroups of non-surgical (light gray), Surgical (dark gray), And for the overall cohort (black diamond). The interaction p-values () are calculated using a Cox regression model that includes interaction terms for the individual GTMK and the binary operation variable and quantify the difference in GTMK influence between the non-operative and operative subgroups. Full regression results are presented in Table S8


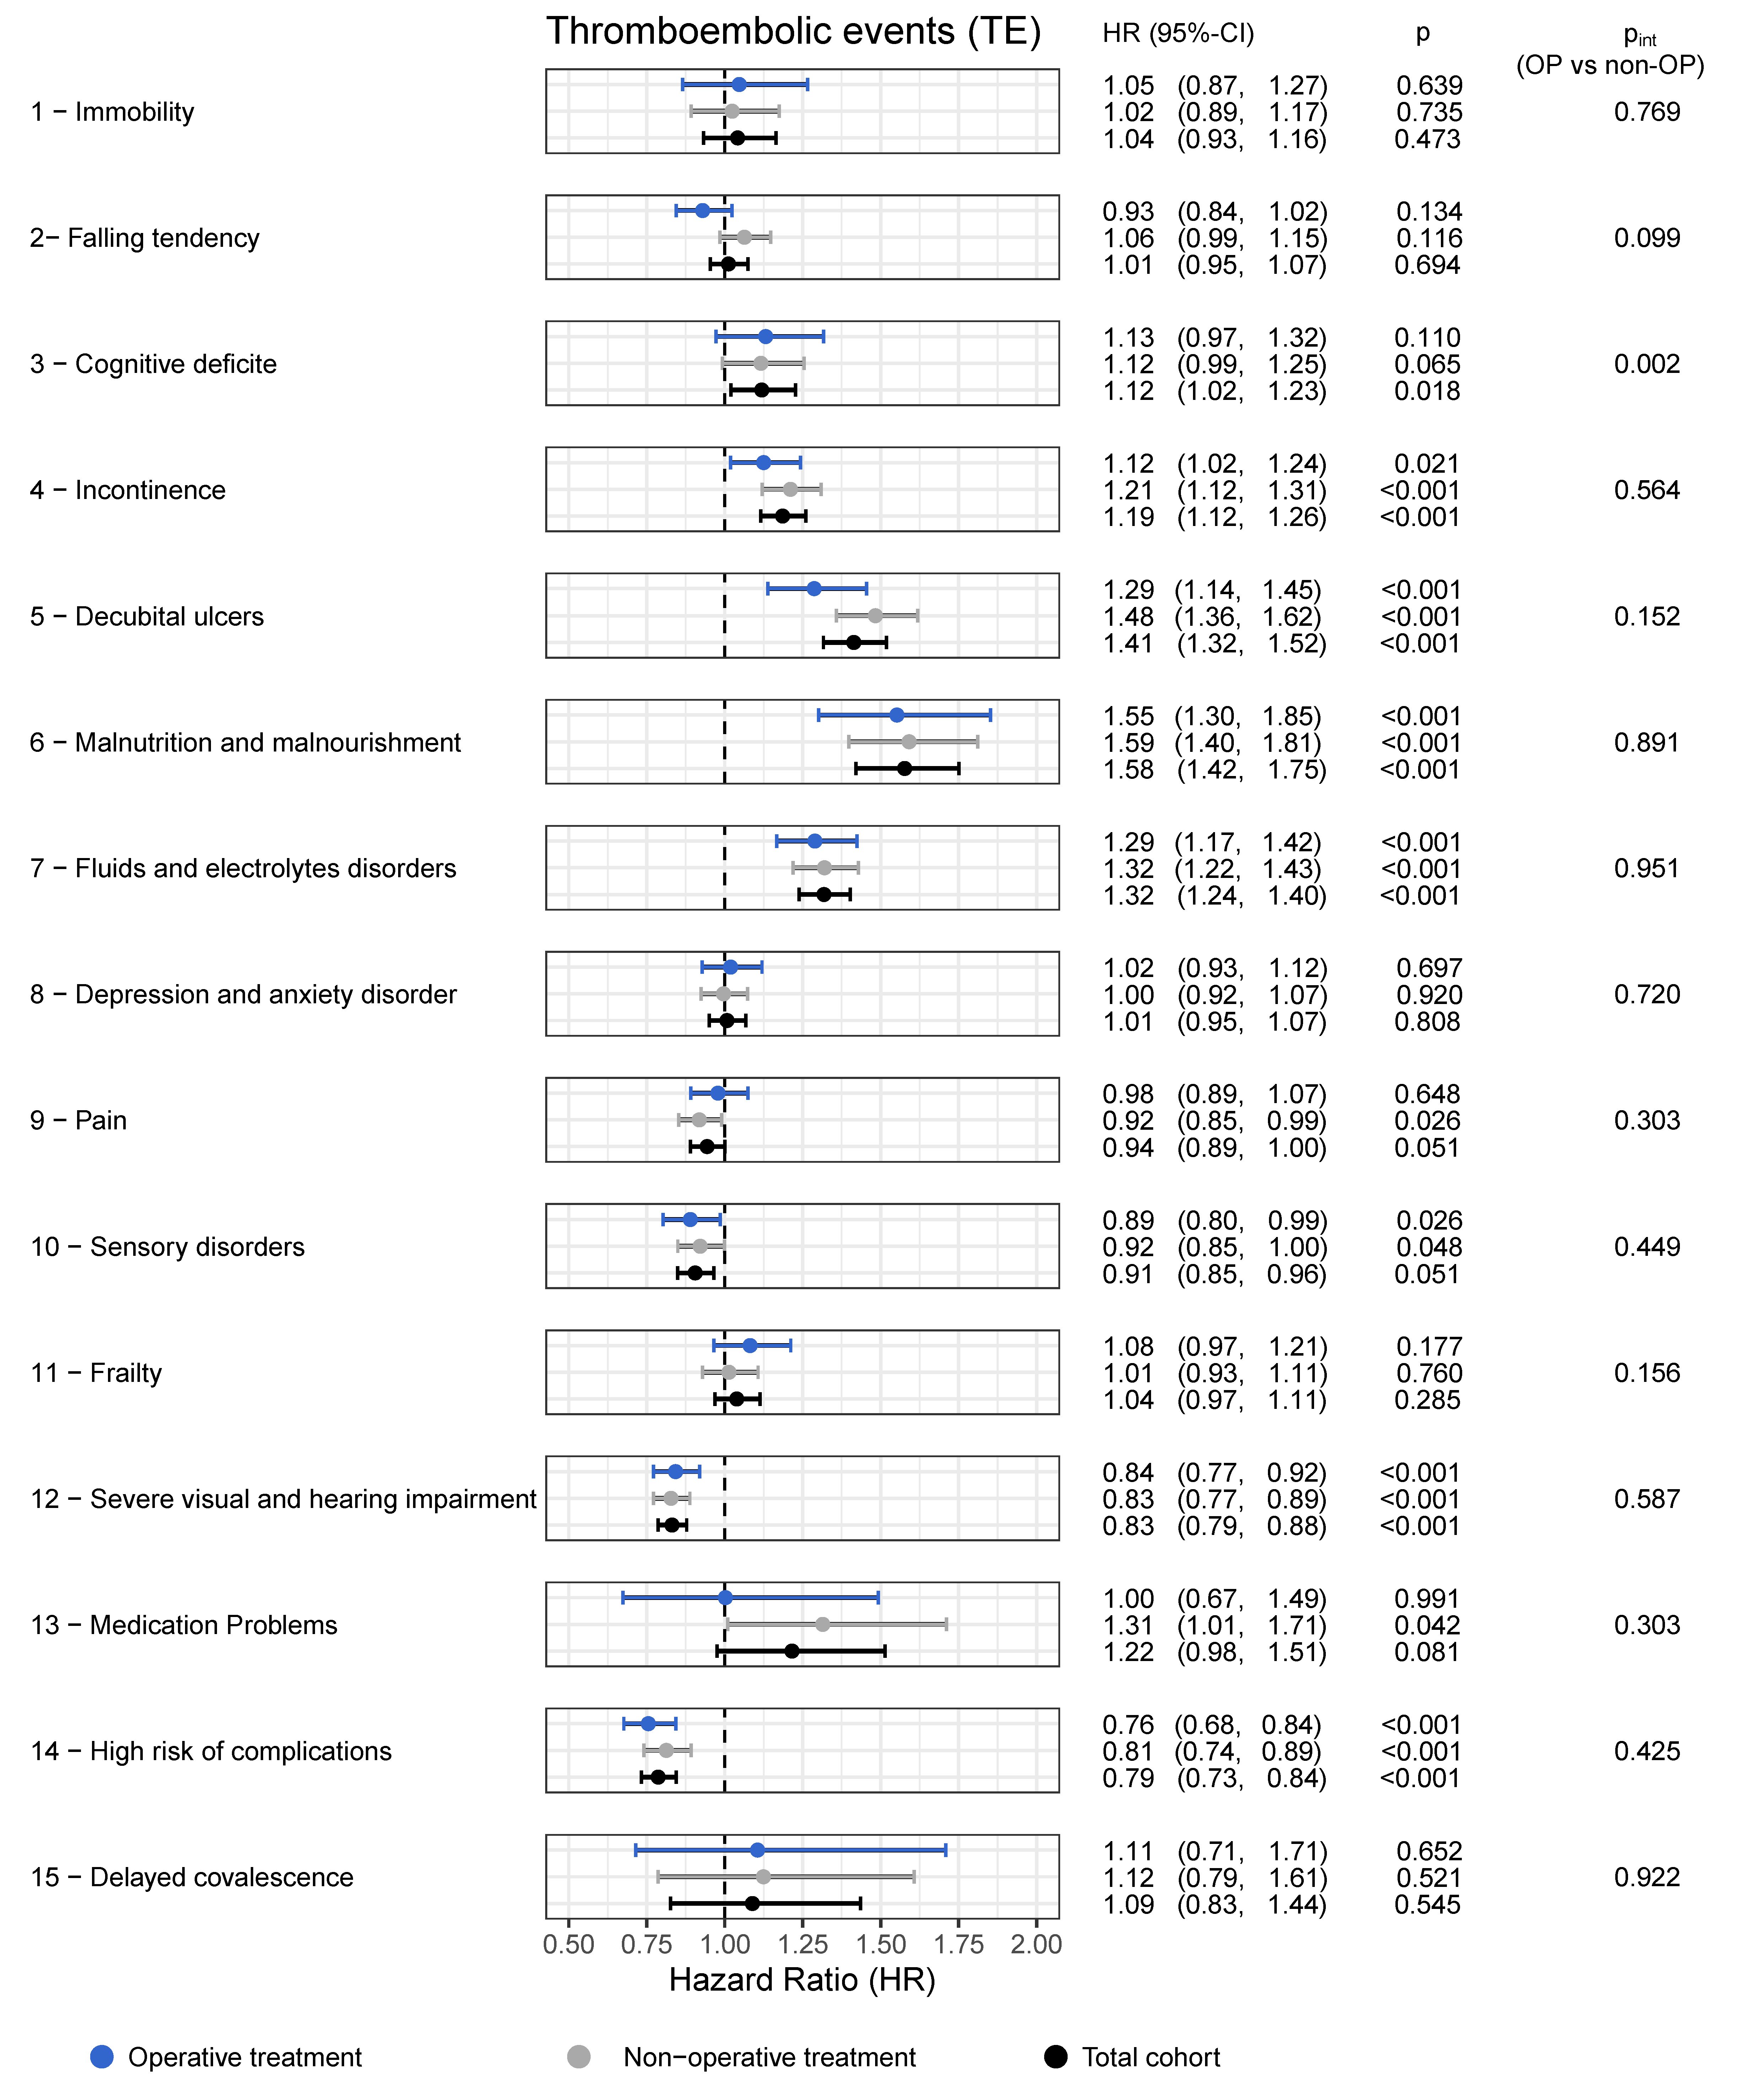


Figure S5: Influence of the individual GTMK on Injury- or Surgical-related complications with adjustment for the patient risk profile. The influence was assessed for the subgroups of non-surgical (light gray), Surgical (dark gray), And for the overall cohort (black diamond). The interaction p-values () are calculated using a Cox regression model that includes interaction terms for the individual GTMK and the binary operation variable and quantify the difference in GTMK influence between the non-operative and operative subgroups. Full regression results are presented in Table S9.


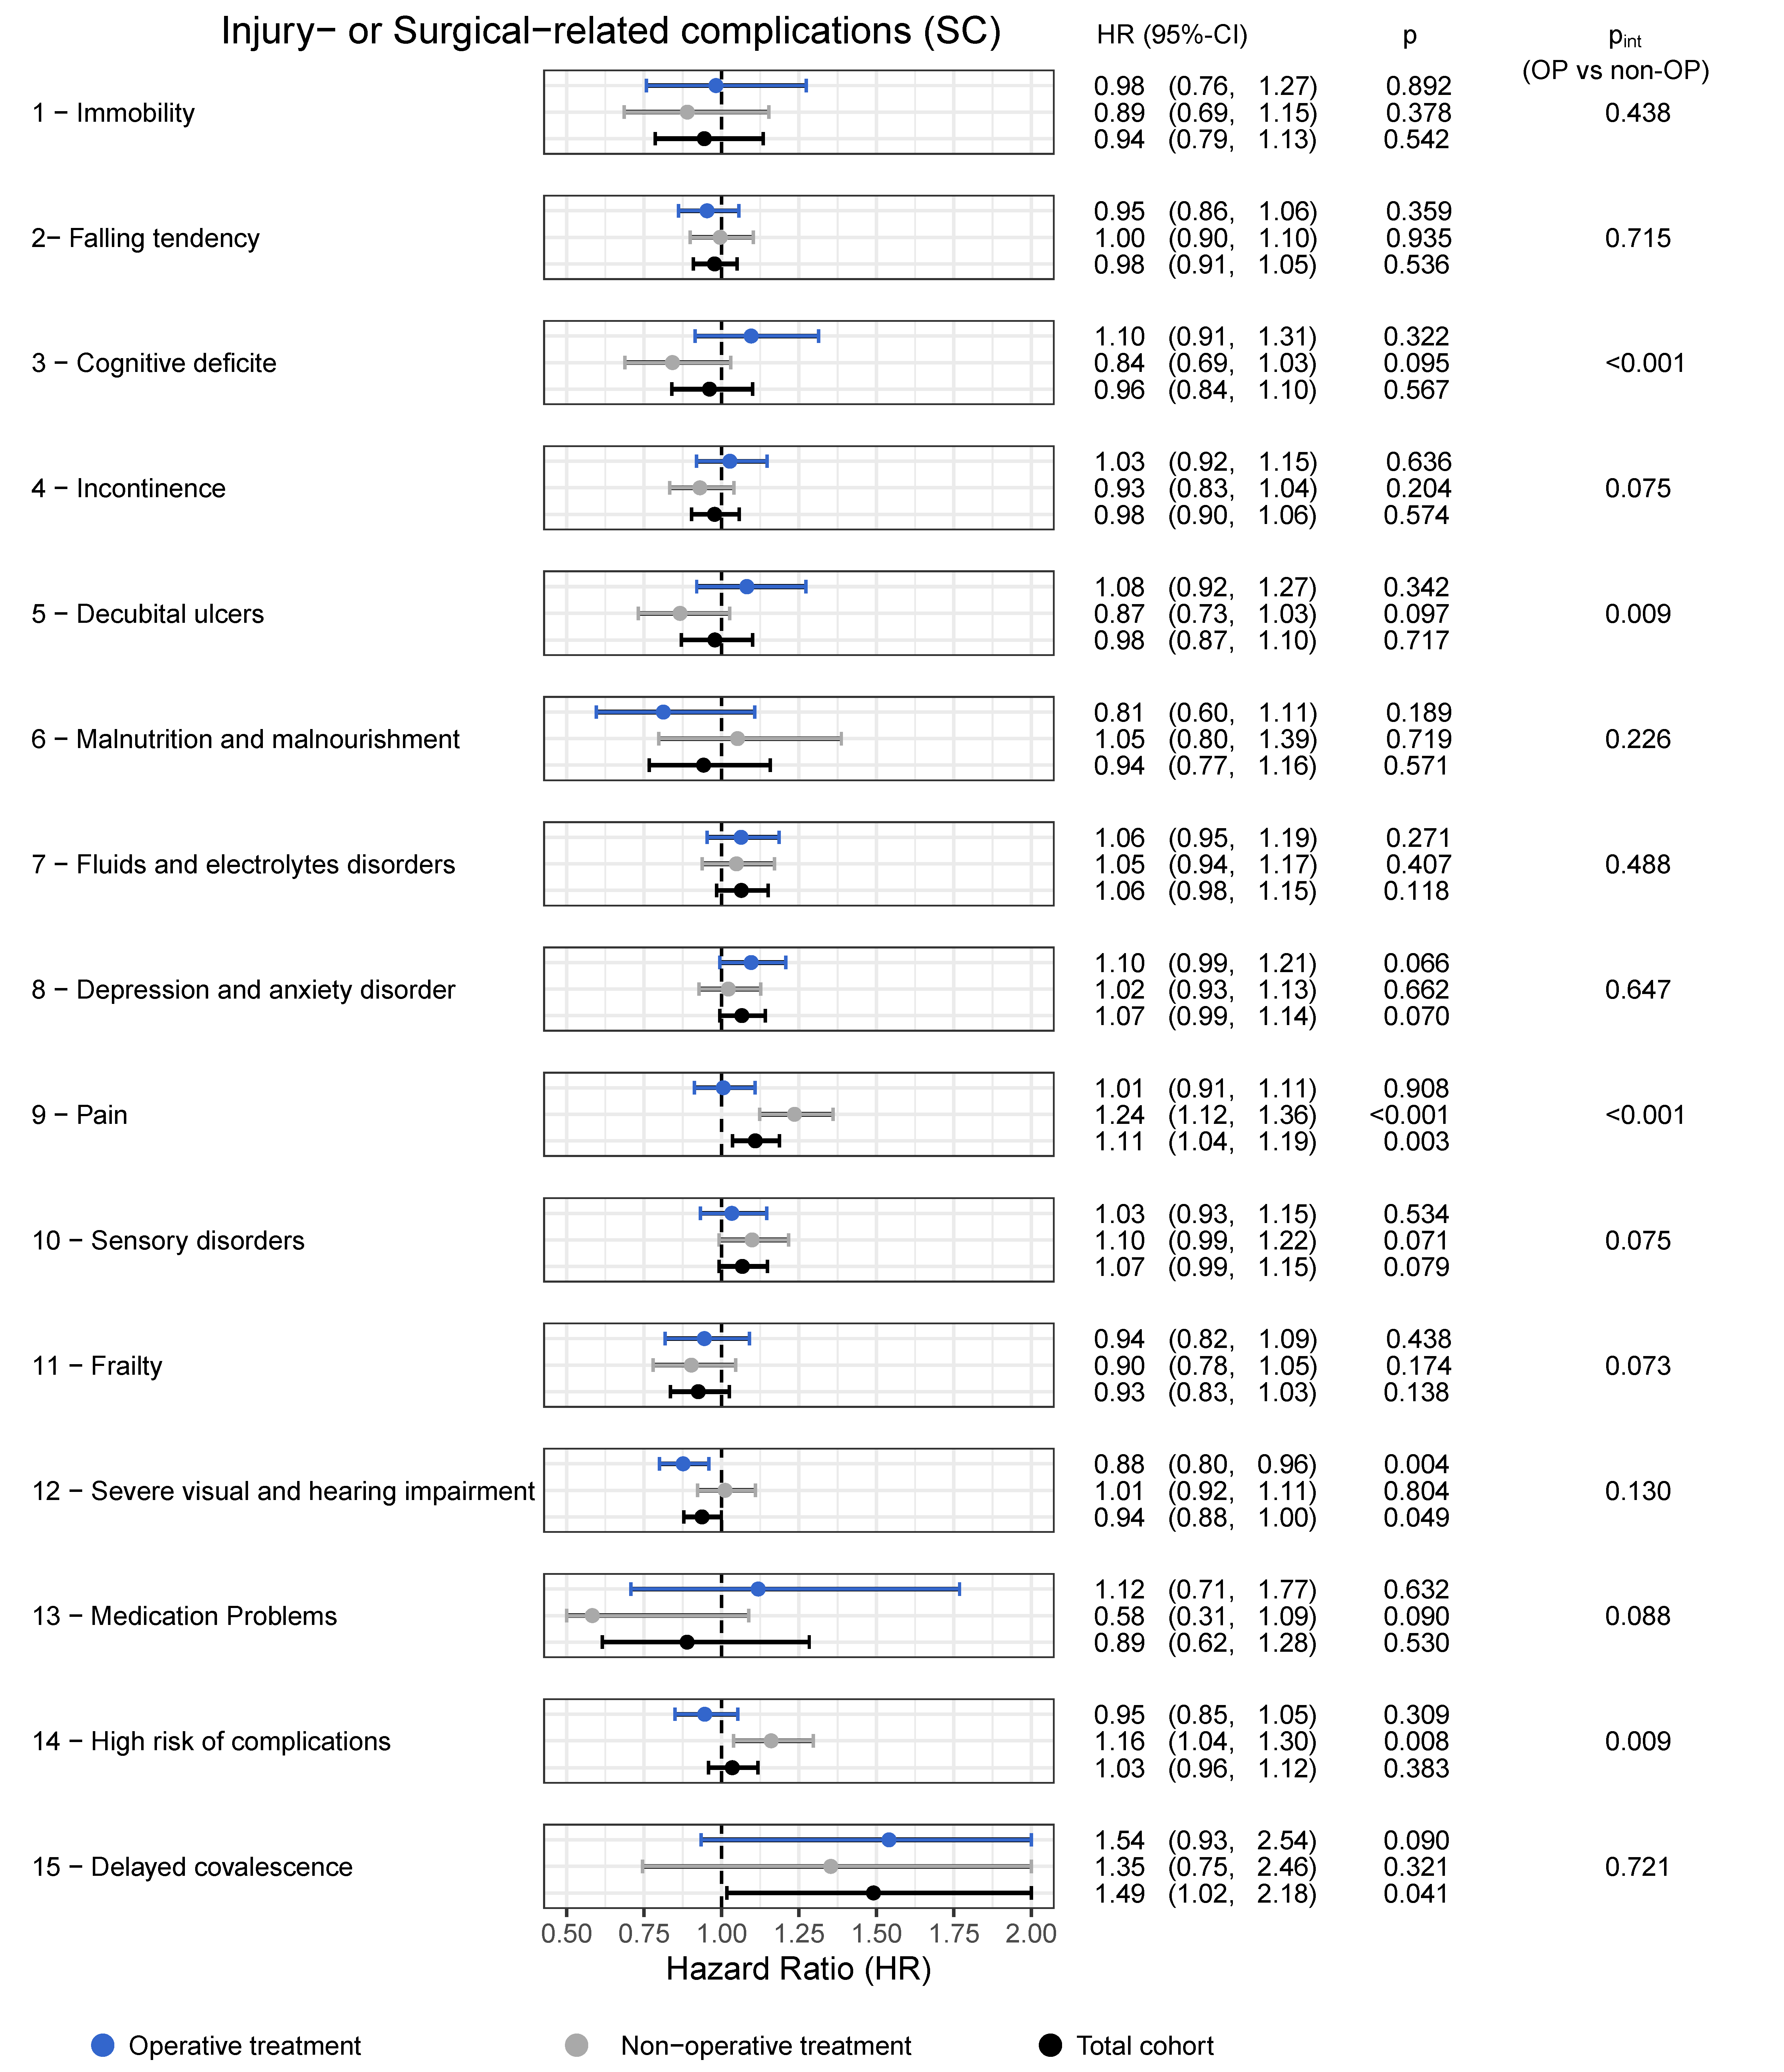


Figure S6: Influence of the individual GTMK on Minor outpatient complications with adjustment for the patient risk profile. The influence was assessed for the subgroups of non-surgical (light gray), Surgical (dark gray), And for the overall cohort (black diamond). The interaction p-values () are calculated using a Cox regression model that includes interaction terms for the individual GTMK and the binary operation variable and quantify the difference in GTMK influence between the non-operative and operative subgroups. Full regression results are presented in Table S10.


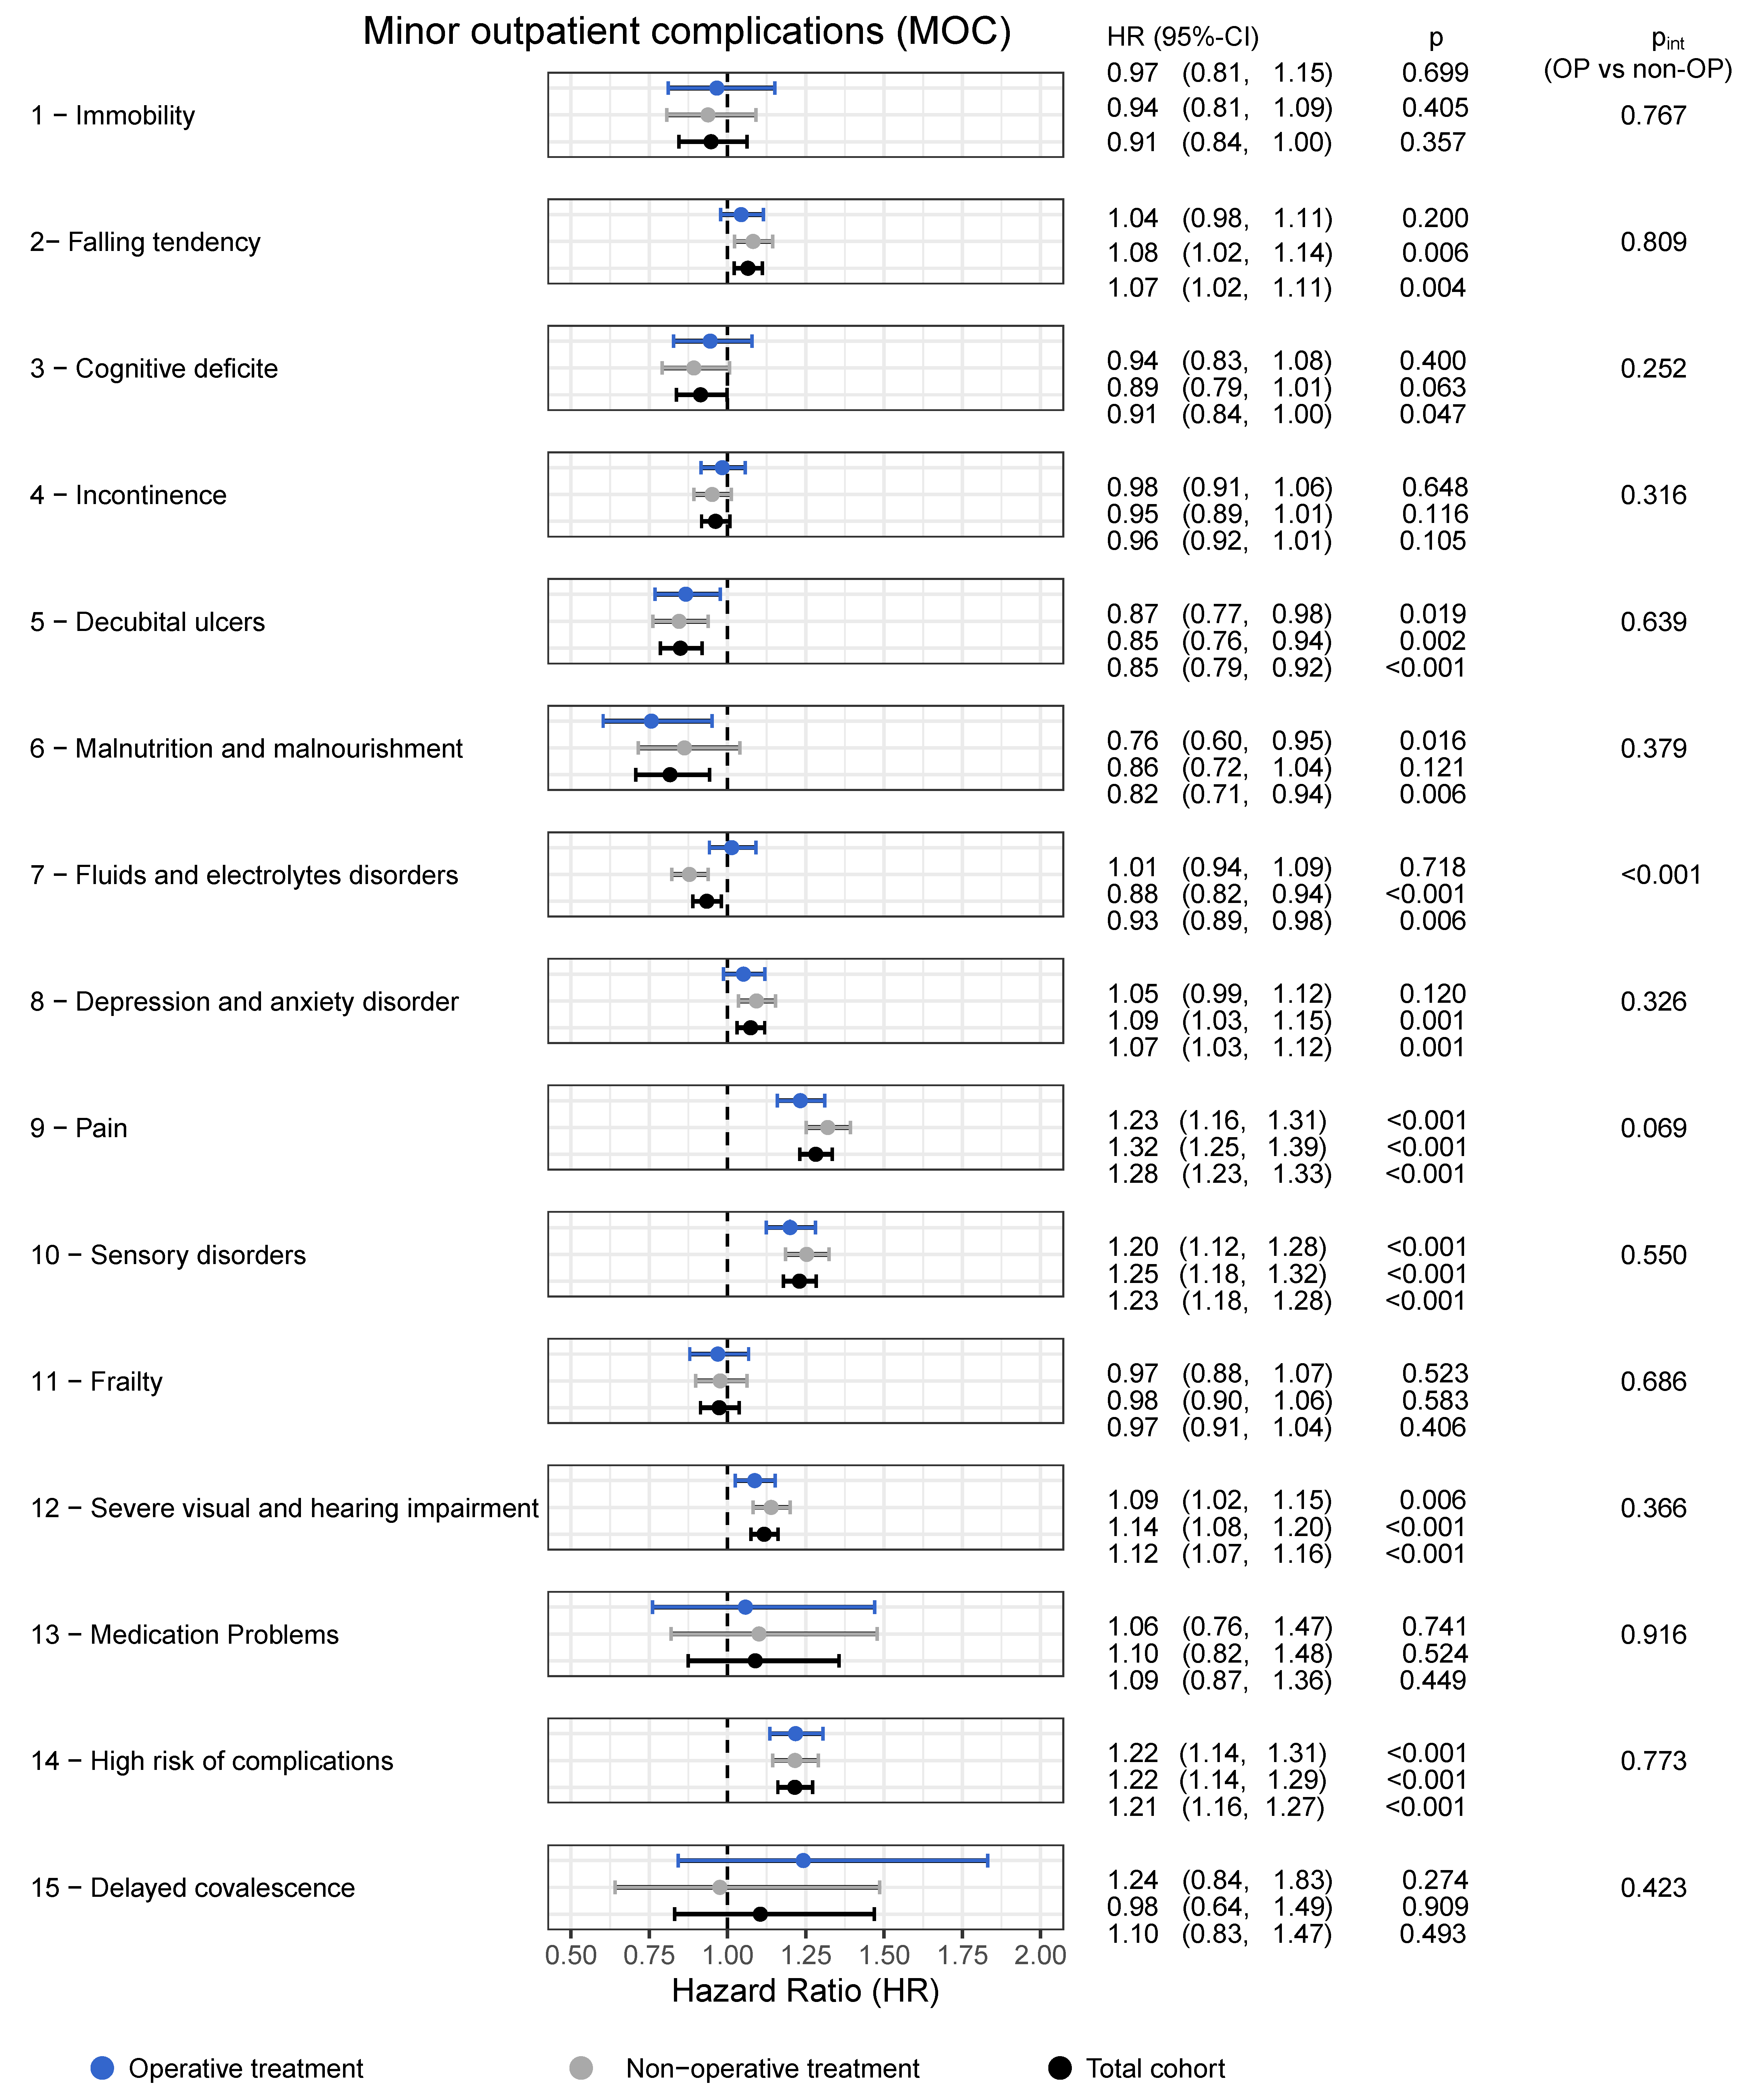


Table S3: Results of the Cox regression with mortality as the endpoint, including the treatment group, number of present GTMK at PHF diagnosis, patient (risk) profile, events occurring within 21 days after PHF diagnosis, and an end of follow-up 3 months after the start ft he observation.

| **Mortality** | | | |
| --- | --- | --- | --- |
| **Variable** | | **HR (95%-CI)** | **p** |
| Treatment group  (Reference group: non-operative treatment) | sLPF | 0.61 (0.55, 0.68) | < 0.001 |
| LPF | 0.74 (0.61, 0.90) | 0.003 |
| RTSA | 0.68 (0.61, 0.76) | < 0.001 |
| Others | 0.87 (0.79, 0.96) | 0.004 |
| Number of geriatric-typical characteristic complexes (GtMk) present at PHF diagnosis  (Reference group: no GTMK) | 1 GTMK | 0.73 (0.59, 0.90) | 0.004 |
| 2 GTMK | 0.82 (0.67, 0.99) | 0.043 |
| 3 GTMK | 0.80 (0.66, 0.96) | 0.020 |
| 4 GTMK | 0.84 (0.70, 1.02) | 0.080 |
| 5 GTMK | 1.00 (0.82, 1.21) | 0.963 |
| 6 GTMK | 1.05 (0.86, 1.28) | 0.636 |
| 7 GTMK | 1.13 (0.92, 1.38) | 0.242 |
| 8 GTMK | 1.09 (0.88, 1.36) | 0.427 |
| 9 and more GTMK | 1.18 (0.94, 1.47) | 0.145 |
| Age in years at PHF diagnosis | | 1,09 (1.08, 1.09) | < 0.001 |
| Female Sex | | 0,59 (0.54, 0.63) | < 0.001 |
| Comorbidities | Cancer | 1.16 (1.08, 1.24) | < 0.001 |
| Diabetes | 1.15 (1.08, 1.23) | < 0.001 |
| Dementia | 1.82 (1.70, 1.96) | < 0.001 |
| Chronic polyarthritis | 1.02 (0.90, 1.16) | 0.761 |
| Obesity | 0.81 (0.74, 0.89) | < 0.001 |
| Nicotine abuse | 1.68 (1.48, 1.89) | < 0.001 |
| Parkinson | 1.13 (1.00, 1.27) | 0.056 |
| Rotator cuff rupture | 0.59 (0.44, 0.80) | 0.001 |
| Alcohol abuse | 1.62 (1.42, 1.85) | < 0.001 |
| Previous stroke | 1.00 (0.93, 1.07) | 0.938 |
| Omarthrosis | 0.84 (0.69, 1.02) | 0.081 |
| Frozen shoulder | 0.81 (0.67, 0.97) | 0.023 |
| Atrial fibrillation and atrial flutter | 1.39 (1.29, 1.50) | < 0.001 |
| Congestive heart failure | 1.46 (1.36, 1.56) | < 0.001 |
| Coronary heart disease | 1.00 (0.94, 1.07) | 0.933 |
| Hypertonus | 0.89 (0.79, 0.99) | 0.027 |
| Atherosclerosis | 1.01 (0.93, 1.09) | 0.875 |
| Chronic kidney disease | 1.31 (1.23, 1.41) | < 0.001 |
| Any anticoagulant | 1.01 (0.94, 1.09) | 0.703 |
| Vitamin D or Calcium | 0.93 (0.69, 1.26) | 0.643 |
| Bisphosphonate | 0.78 (0.59, 1.05) | 0.102 |
| Osteoporosis | 0.97 (0.90, 1.04) | 0.337 |
| Any osteoporosis medication | 1.24 (0.89, 1.71) | 0.200 |
| Outpatient sector | | 0.43 (0.39, 0.47) | < 0.001 |
| Event within 21 days after diagnosis | Treatment change | 0.84 (0.65, 1.08) | 0.178 |
| Thromboembolic event | 1.17 (0.50, 2.71) | 0.721 |
| Injury-related event | 0.65 (0.50, 0.86) | 0.002 |
| Major adverse event | 2.01 (1.21, 3.35) | 0.007 |
| Minor outpatient event | 0.69 (0.52, 0.92) | 0.010 |

Table S4: Results of the Cox regression with major adverse events (MAE) as the endpoint, including the treatment group, number of present GTMK at PHF diagnosis, patient (risk) profile, events occurring within 21 days after PHF diagnosis, and an end of follow-up 3 months after the start of the observation.

| **Major adverse events (MAE)** | | | |
| --- | --- | --- | --- |
| **Variable** | | **HR (95%-CI)** | **p** |
| Treatment group  (Reference group: non-operative treatment) | sLPF | 0.63 (0.58, 0.68) | < 0.001 |
| LPF | 0.72 (0.61, 0.84) | < 0.001 |
| RTSA | 0.83 (0.76, 0.89) | < 0.001 |
| Others | 0.86 (0.79, 0.92) | < 0.001 |
| Number of geriatric-typical characteristic complexes (GtMk) present at PHF diagnosis  (Reference group: no GTMK) | 1 GTMK | 0.76 (0.65, 0.89) | 0.001 |
| 2 GTMK | 0.79 (0.69, 0.92) | 0.002 |
| 3 GTMK | 0.80 (0.69, 0.92) | 0.002 |
| 4 GTMK | 0.86 (0.74, 0.99) | 0.040 |
| 5 GTMK | 0.94 (0.81, 1.08) | 0.384 |
| 6 GTMK | 0.98 (0.85, 1.14) | 0.842 |
| 7 GTMK | 1.08 (0.92, 1.26) | 0.343 |
| 8 GTMK | 1.05 (0.89, 1.24) | 0.589 |
| 9 and more GTMK | 1.08 (0.91, 1.29) | 0.354 |
| Age in years at PHF diagnosis | | 1,06 (1.05, 1.06) | < 0.001 |
| Female Sex | | 0,64 (0.60, 0.68) | < 0.001 |
| Comorbidities | Cancer | 1.08 (1.03, 1.14) | 0.003 |
| Diabetes | 1.20 (1.14, 1.27) | < 0.001 |
| Dementia | 1.53 (1.44, 1.62) | < 0.001 |
| Chronic polyarthritis | 1.04 (0.94, 1.15) | 0.421 |
| Obesity | 0.91 (0.85, 0.97) | 0.003 |
| Nicotine abuse | 1.50 (1.37, 1.65) | < 0.001 |
| Parkinson | 1.04 (0.94, 1.15) | 0.399 |
| Rotator cuff rupture | 0.68 (0.55, 0.84) | < 0.001 |
| Alcohol abuse | 1.61 (1.46, 1.78) | < 0.001 |
| Previous stroke | 1.08 (1.03, 1.14) | 0.004 |
| Omarthrosis | 0.87 (0.75, 1.01) | 0.076 |
| Frozen shoulder | 0.83 (0.72, 0.95) | 0.007 |
| Atrial fibrillation and atrial flutter | 1.40 (1.32, 1.48) | < 0.001 |
| Congestive heart failure | 1.40 (1.32, 1.48) | < 0.001 |
| Coronary heart disease | 1.02 (0.96, 1.07) | 0.537 |
| Hypertonus | 1.03 (0.94, 1.12) | 0.565 |
| Atherosclerosis | 1.02 (0.96, 1.08) | 0.566 |
| Chronic kidney disease | 1.54 (1.46, 1.63) | < 0.001 |
| Any anticoagulant | 1.05 (0.99, 1.11) | 0.117 |
| Vitamin D or Calcium | 0.93 (0.73, 1.18) | 0.547 |
| Bisphosphonate | 0.76 (0.60, 0.95) | 0.016 |
| Osteoporosis | 0.95 (0.90, 1.00) | 0.051 |
| Any osteoporosis medication | 1.27 (0.98, 1.63) | 0.067 |
| Outpatient sector | | 0.39 (0.36, 0.42) | < 0.001 |
| Event within 21 days after diagnosis | Treatment change | 0.97 (0.82, 1.15) | 0.728 |
| Thromboembolic event | 1.55 (0.89, 2.69) | 0.119 |
| Injury-related event | 0.71 (0.58, 0.86) | < 0.001 |
| Major adverse event | 2.73 (1.93, 3.88) | < 0.001 |
| Minor outpatient event | 0.68 (0.55, 0.84) | < 0.001 |

Table S5: Results of the Cox regression with thromboembolic event (TE) as the endpoint, including the treatment group, number of present GTMK at PHF diagnosis, patient (risk) profile, events occurring within 21 days after PHF diagnosis, and an end of follow-up 3 months after the start of the observation.

| **Thromboembolic events (TE)** | | | |
| --- | --- | --- | --- |
| **Variable** | | **HR (95%-CI)** | **p** |
| Treatment group  (Reference group: non-operative treatment) | sLPF | 0.64 (0.58, 0.7) | < 0.001 |
| LPF | 0.70 (0.59, 0.83) | < 0.001 |
| RTSA | 0.76 (0.69, 0.83) | < 0.001 |
| Others | 0.90 (0.82, 0.97) | 0.010 |
| Number of geriatric-typical characteristic complexes (GtMk) present at PHF diagnosis  (Reference group: no GTMK) | 1 GTMK | 0.80 (0.67, 0.95) | 0.011 |
| 2 GTMK | 0.79 (0.67, 0.93) | 0.005 |
| 3 GTMK | 0.82 (0.69, 0.96) | 0.014 |
| 4 GTMK | 0.88 (0.75, 1.03) | 0.109 |
| 5 GTMK | 0.99 (0.84, 1.16) | 0.859 |
| 6 GTMK | 1.07 (0.90, 1.26) | 0.450 |
| 7 GTMK | 1.12 (0.94, 1.33) | 0.206 |
| 8 GTMK | 1.09 (0.91, 1.32) | 0.351 |
| 9 and more GTMK | 1.14 (0.94, 1.38) | 0.180 |
| Age in years at PHF diagnosis | | 1,07 (1.07, 1.07) | < 0.001 |
| Female Sex | | 0,66 (0.62, 0.71) | < 0.001 |
| Comorbidities | Cancer | 1.10 (1.04, 1.17) | 0.001 |
| Diabetes | 1.15 (1.08, 1.22) | < 0.001 |
| Dementia | 1.69 (1.58, 1.80) | < 0.001 |
| Chronic polyarthritis | 1.01 (0.90, 1.13) | 0.831 |
| Obesity | 0.86 (0.79, 0.92) | < 0.001 |
| Nicotine abuse | 1.55 (1.39, 1.72) | < 0.001 |
| Parkinson | 1.08 (0.97, 1.21) | 0.167 |
| Rotator cuff rupture | 0.58 (0.45, 0.76) | < 0.001 |
| Alcohol abuse | 1.50 (1.33, 1.68) | < 0.001 |
| Previous stroke | 1.10 (1.04, 1.17) | 0.002 |
| Omarthrosis | 0.88 (0.74, 1.04) | 0.135 |
| Frozen shoulder | 0.80 (0.68, 0.94) | 0.006 |
| Atrial fibrillation and atrial flutter | 1.32 (1.23, 1.41) | < 0.001 |
| Congestive heart failure | 1.32 (1.24, 1.41) | < 0.001 |
| Coronary heart disease | 1.00 (0.94, 1.07) | 0.928 |
| Hypertonus | 0.95 (0.87, 1.05) | 0.326 |
| Atherosclerosis | 1.02 (0.96, 1.09) | 0.522 |
| Chronic kidney disease | 1.26 (1.18, 1.34) | < 0.001 |
| Any anticoagulant | 1.05 (0.98, 1.12) | 0.175 |
| Vitamin D or Calcium | 0.95 (0.73, 1.23) | 0.697 |
| Bisphosphonate | 0.81 (0.63, 1.04) | 0.102 |
| Osteoporosis | 0.97 (0.91, 1.03) | 0.288 |
| Any osteoporosis medication | 1.19 (0.90, 1.57) | 0.227 |
| Outpatient sector | | 0.42 (0.38, 0.45) | < 0.001 |
| Event within 21 days after diagnosis | Treatment change | 0.84 (0.68, 1.04) | 0.112 |
| Thromboembolic event | 2.96 (1.58, 5.56) | 0.001 |
| Injury-related event | 0.68 (0.54, 0.86) | 0.001 |
| Major adverse event | 1.87 (1.17, 3.00) | 0.009 |
| Minor outpatient event | 0.77 (0.61, 0.97) | 0.025 |

Table S6: Results of the Cox regression with injury- or surgical related complications (SC) as the endpoint and death as competing event, including the treatment group, number of present GTMK at PHF diagnosis, patient (risk) profile, events occurring within 21 days after PHF diagnosis, and an end of follow-up 3 months after the start of the observation.

| **Injury- or surgical related complications (SC)** | | | |
| --- | --- | --- | --- |
| Variable | | HR (95%-CI) | p |
| Treatment group  (Reference group: non-operative treatment) | sLPF | 0.66 (0.59, 0.75) | < 0.001 |
| LPF | 0.58 (0.45, 0.75) | < 0.001 |
| RTSA | 0.69 (0.61, 0.78) | < 0.001 |
| Others | 0.78 (0.69, 0.87) | < 0.001 |
| Number of geriatric-typical characteristic complexes (GtMk) present at PHF diagnosis  (Reference group: no GTMK) | 1 GTMK | 1.01 (0.86, 1.19) | 0.906 |
| 2 GTMK | 1.00 (0.85, 1.18) | 0.979 |
| 3 GTMK | 1.09 (0.93, 1.27) | 0.312 |
| 4 GTMK | 1.15 (0.98, 1.36) | 0.084 |
| 5 GTMK | 1.09 (0.92, 1.29) | 0.345 |
| 6 GTMK | 1.23 (1.02, 1.47) | 0.026 |
| 7 GTMK | 1.07 (0.87, 1.31) | 0.532 |
| 8 GTMK | 1.13 (0.89, 1.43) | 0.308 |
| 9 and more GTMK | 1.00 (0.76, 1.30) | 0.972 |
| Age in years at PHF diagnosis | | 0,99 (0,99, 1.00) | 0.012 |
| Female Sex | | 0,80 (0,74, 0,87) | < 0.001 |
| Comorbidities | Cancer | 1.04 (0.97, 1.12) | 0.228 |
| Diabetes | 1.01 (0.94, 1.08) | 0.792 |
| Dementia | 0.97 (0.88, 1.08) | 0.627 |
| Chronic polyarthritis | 0.98 (0.86, 1.11) | 0.745 |
| Obesity | 1.18 (1.09, 1.27) | < 0.001 |
| Nicotine abuse | 1.13 (1.01, 1.27) | 0.039 |
| Parkinson | 1.31 (1.14, 1.51) | < 0.001 |
| Rotator cuff rupture | 1.53 (1.30, 1.80) | < 0.001 |
| Alcohol abuse | 1.49 (1.33, 1.68) | < 0.001 |
| Previous stroke | 0.91 (0.84, 0.98) | 0.013 |
| Omarthrosis | 1.01 (0.85, 1.22) | 0.876 |
| Frozen shoulder | 1.07 (0.92, 1.24) | 0.396 |
| Atrial fibrillation and atrial flutter | 1.07 (0.98, 1.17) | 0.143 |
| Congestive heart failure | 1.11 (1.02, 1.20) | 0.015 |
| Coronary heart disease | 0.98 (0.91, 1.06) | 0.671 |
| Hypertonus | 1.11 (1.01, 1.22) | 0.036 |
| Atherosclerosis | 0.98 (0.90, 1.07) | 0.692 |
| Chronic kidney disease | 1.09 (1.00, 1.17) | 0.039 |
| Any anticoagulant | 1.02 (0.94, 1.11) | 0.632 |
| Vitamin D or Calcium | 1.00 (0.76, 1.32) | 0.994 |
| Bisphosphonate | 1.11 (0.84, 1.46) | 0.463 |
| Osteoporosis | 1.09 (1.01, 1.18) | 0.021 |
| Any osteoporosis medication | 0.95 (0.70, 1.29) | 0.745 |
| Outpatient sector | | 0.86 (0.78, 0.94) | 0.002 |
| Event within 21 days after diagnosis | Treatment change | 18.85 (16.89, 21.04) | < 0.001 |
| Thromboembolic event | 0.89 (0.23, 3.36) | 0.861 |
| Injury-related event | 1.25 (1.03, 1.52) | 0.025 |
| Major adverse event | 2.38 (1.15, 4.95) | 0.020 |
| Minor outpatient event | 1.30 (1.11, 1.52) | 0.001 |

Table S7: Results of the Cox regression with minor outpatient complications (SC) as the endpoint and death as competing event, including the treatment group, number of present GTMK at PHF diagnosis, patient (risk) profile, events occurring within 21 days after PHF diagnosis, and an end of follow-up 3 months after the start of the observation

| **Minor outpatient complications (MOC)** | | | |
| --- | --- | --- | --- |
| Variable | | HR (95%-CI) | p |
| Treatment group  (Reference group: non-operative treatment) | sLPF | 1.05 (0.99, 1.12) | 0.100 |
| LPF | 1.01 (0.89, 1.14) | 0.879 |
| RTSA | 1.21 (1.13, 1.30) | < 0.001 |
| Others | 1.13 (1.05, 1.21) | 0.001 |
| Number of geriatric-typical characteristic complexes (GtMk) present at PHF diagnosis  (Reference group: no GTMK) | 1 GTMK | 1.19 (1.07, 1.32) | 0.001 |
| 2 GTMK | 1.32 (1.20, 1.46) | < 0.001 |
| 3 GTMK | 1.50 (1.36, 1.65) | < 0.001 |
| 4 GTMK | 1.61 (1.46, 1.78) | < 0.001 |
| 5 GTMK | 1.83 (1.65, 2.03) | < 0.001 |
| 6 GTMK | 1.80 (1.61, 2.02) | < 0.001 |
| 7 GTMK | 1.81 (1.60, 2.05) | < 0.001 |
| 8 GTMK | 1.79 (1.54, 2.07) | < 0.001 |
| 9 and more GTMK | 2.02 (1.72, 2.37) | < 0.001 |
| Age in years at PHF diagnosis | | 0.97 (0.97, 0.98) | < 0.001 |
| Female Sex | | 0.93 (0.89, 0.98) | 0.011 |
| Comorbidities | Cancer | 1.04 (1.00, 1.08) | 0.076 |
| Diabetes | 0.96 (0.92, 1.00) | 0.052 |
| Dementia | 0.69 (0.64, 0.74) | < 0.001 |
| Chronic polyarthritis | 1.07 (1.00, 1.15) | 0.060 |
| Obesity | 1.12 (1.07, 1.18) | < 0.001 |
| Nicotine abuse | 0.92 (0.86, 1.00) | 0.038 |
| Parkinson | 0.87 (0.78, 0.97) | 0.010 |
| Rotator cuff rupture | 1.92 (1.78, 2.08) | < 0.001 |
| Alcohol abuse | 0.89 (0.82, 0.98) | 0.014 |
| Previous stroke | 1.07 (1.03, 1.12) | 0.002 |
| Omarthrosis | 1.80 (1.67, 1.94) | < 0.001 |
| Frozen shoulder | 3.37 (3.18, 3.56) | < 0.001 |
| Atrial fibrillation and atrial flutter | 0.90 (0.85, 0.96) | 0.001 |
| Congestive heart failure | 0.97 (0.92, 1.02) | 0.185 |
| Coronary heart disease | 1.04 (0.99, 1.09) | 0.100 |
| Hypertonus | 1.05 (0.99, 1.10) | 0.108 |
| Atherosclerosis | 1.00 (0.95, 1.06) | 0.903 |
| Chronic kidney disease | 1.00 (0.95, 1.05) | 0.952 |
| Any anticoagulant | 0.94 (0.90, 0.99) | 0.018 |
| Vitamin D or Calcium | 1.05 (0.90, 1.23) | 0.530 |
| Bisphosphonate | 1.05 (0.90, 1.23) | 0.528 |
| Osteoporosis | 1.12 (1.07, 1.17) | < 0.001 |
| Any osteoporosis medication | 0.97 (0.82, 1.16) | 0.779 |
| Outpatient sector | | 1.02 (0.96, 1.07) | 0.578 |
| Event within 21 days after diagnosis | Treatment change | 1.49 (1.34, 1.67) | < 0.001 |
| Thromboembolic event | 3.04 (0.98, 9.46) | 0.055 |
| Injury-related event | 3.26 (3.01, 3.54) | < 0.001 |
| Major adverse event | 0.45 (0.18, 1.10) | 0.079 |
| Minor outpatient event | 3.00 (2.82, 3.21) | < 0.001 |

Table S8: Results of the Cox regression models with mortality as an outcome for the overall cohort, the subgroup of those who underwent surgery within 21 days of PHF diagnosis, and those who did not. Included variables are current GTMK at the time of PHF diagnosis, patient (risk) profile, and events that occurred within 21 days of PHF diagnosis, with an end of follow-up 3 months after the start of observation. The difference between operative and non-operative treatment within individual GTMK is quantified with the interaction p value . This comes from a Cox regression which, in addition to the influencing factors listed here, also includes the interaction between operation and the individual GTMK.

| **Mortality** | | | | | | | |
| --- | --- | --- | --- | --- | --- | --- | --- |
|  | **Total cohort** | | **Subgroup:  Operative Treatment** | | **Subgroup:  Non-Operative Treatment** | | **OP vs no OP** |
| **Variable** | **HR (95%-CI)** | **p** | **HR (95%-CI)** | **P** | **HR (95%-CI)** | **p** | **Pint** |
| Immobility | 1.05 (0.93, 1.18) | 0.478 | 1.15 (0.93, 1.41) | 0.198 | 0.98 (0.84, 1.14) | 0.809 | 0.194 |
| Falling tendency | 0.98 (0.92, 1.05) | 0.656 | 0.91 (0.82, 1.02) | 0.114 | 1.02 (0.94, 1.11) | 0.633 | 0.311 |
| Cognitive deficits | 1.14 (1.03, 1.26) | 0.014 | 1.16 (0.97, 1.38) | 0.097 | 1.13 (1.00, 1.29) | 0.059 | 0.002 |
| Incontinence | 1.22 (1.13, 1.30) | < 0.001 | 1.16 (1.03, 1.30) | 0.013 | 1.23 (1.13, 1.35) | < 0.001 | 0.771 |
| Decubital ulcers | 1.51 (1.40, 1.63) | < 0.001 | 1.35 (1.17, 1.54) | < 0.001 | 1.59 (1.45, 1.75) | < 0.001 | 0.148 |
| Malnutrition and malnourishment | 1.68 (1.51, 1.88) | < 0.001 | 1.66 (1.37, 2.01) | < 0.001 | 1.70 (1.48, 1.95) | < 0.001 | 0.872 |
| Fluids and electrolytes disorders | 1.40 (1.30, 1.50) | < 0.001 | 1.33 (1.18, 1.49) | < 0.001 | 1.42 (1.30, 1.55) | < 0.001 | 0.698 |
| Depression and anxiety disorders | 1.01 (0.95, 1.08) | 0.692 | 1.03 (0.92, 1.15) | 0.620 | 1.00 (0.92, 1.09) | 0.998 | 0.789 |
| Pain | 0.93 (0.87, 1.00) | 0.036 | 0.98 (0.88, 1.10) | 0.744 | 0.90 (0.83, 0.98) | 0.015 | 0.219 |
| Sensory disorders | 0.89 (0.82, 0.95) | 0.001 | 0.88 (0.78, 0.99) | 0.036 | 0.90 (0.82, 0.98) | 0.020 | 0.607 |
| Frailty | 1.03 (0.95, 1.11) | 0.433 | 1.07 (0.94, 1.22) | 0.297 | 1.01 (0.92, 1.11) | 0.838 | 0.170 |
| Severe visual and hearing impairment | 0.79 (0.74, 0.84) | < 0.001 | 0.80 (0.72, 0.88) | < 0.001 | 0.79 (0.73, 0.85) | < 0.001 | 0.647 |
| Medication problems | 1.23 (0.97, 1.57) | 0.090 | 1.13 (0.73, 1.75) | 0.582 | 1.26 (0.94, 1.7) | 0.117 | 0.709 |
| High risk of complications | 0.75 (0.69, 0.81) | < 0.001 | 0.71 (0.62, 0.81) | < 0.001 | 0.78 (0.7, 0.86) | < 0.001 | 0.452 |
| Delayed convalescence | 0.98 (0.71, 1.34) | 0.878 | 1.16 (0.72, 1.85) | 0.547 | 0.90 (0.58, 1.39) | 0.632 | 0.456 |
| Age in years at PHF diagnosis | 1.09 (1.08, 1.10) | < 0.001 | 1.10 (1.09, 1.11) | < 0.001 | 1.08 (1.07, 1.08) | < 0.001 |  |
| Female Sex | 0.57 (0.53, 0.61) | < 0.001 | 0.57 (0.50, 0.65) | < 0.001 | 0.58 (0.53, 0.64) | < 0.001 |  |
| Cancer | 1.19 (1.11, 1.27) | < 0.001 | 1.15 (1.03, 1.28) | 0.013 | 1.22 (1.12, 1.32) | < 0.001 |  |
| Diabetes | 1.18 (1.10, 1.26) | < 0.001 | 1.19 (1.07, 1.33) | 0.002 | 1.16 (1.07, 1.27) | < 0.001 |  |
| Dementia | 1.59 (1.44, 1.76) | < 0.001 | 1.81 (1.53, 2.15) | < 0.001 | 1.45 (1.28, 1.65) | < 0.001 |  |
| Chronic polyarthritis | 1.05 (0.92, 1.19) | 0.501 | 1.00 (0.80, 1.25) | 0.997 | 1.05 (0.9, 1.24) | 0.533 |  |
| Obesity | 0.84 (0.77, 0.92) | < 0.001 | 0.87 (0.75, 1.01) | 0.068 | 0.83 (0.74, 0.93) | 0.002 |  |
| Nicotine abuse | 1.62 (1.43, 1.83) | < 0.001 | 1.63 (1.34, 1.99) | < 0.001 | 1.60 (1.37, 1.87) | < 0.001 |  |
| Parkinson | 1.11 (0.98, 1.25) | 0.099 | 1.21 (0.99, 1.47) | 0.060 | 1.03 (0.89, 1.21) | 0.668 |  |
| Rotator cuff rupture | 0.55 (0.41, 0.74) | < 0.001 | 0.67 (0.47, 0.95) | 0.023 | 0.41 (0.22, 0.77) | 0.006 |  |
| Alcohol abuse | 1.53 (1.34, 1.75) | < 0.001 | 1.73 (1.41, 2.12) | < 0.001 | 1.41 (1.18, 1.68) | < 0.001 |  |
| Previous stroke | 1.03 (0.96, 1.10) | 0.402 | 1.05 (0.94, 1.17) | 0.408 | 1.01 (0.93, 1.10) | 0.848 |  |
| Omarthrosis | 0.9 (0.74, 1.10) | 0.305 | 0.84 (0.59, 1.20) | 0.348 | 0.93 (0.74, 1.18) | 0.548 |  |
| Frozen shoulder | 0.85 (0.71, 1.02) | 0.082 | 0.88 (0.65, 1.19) | 0.396 | 0.83 (0.66, 1.05) | 0.120 |  |
| Atrial fibrillation and atrial flutter | 1.46 (1.35, 1.58) | < 0.001 | 1.49 (1.31, 1.69) | < 0.001 | 1.42 (1.29, 1.57) | < 0.001 |  |
| Congestive heart failure | 1.37 (1.28, 1.47) | < 0.001 | 1.39 (1.23, 1.56) | < 0.001 | 1.35 (1.24, 1.48) | < 0.001 |  |
| Coronary heart disease | 1.03 (0.96, 1.11) | 0.366 | 1.09 (0.97, 1.22) | 0.147 | 1.00 (0.92, 1.09) | 0.980 |  |
| Hypertonus | 0.9 (0.81, 1.01) | 0.068 | 0.89 (0.75, 1.06) | 0.192 | 0.92 (0.80, 1.05) | 0.202 |  |
| Atherosclerosis | 1.02 (0.94, 1.10) | 0.678 | 1.06 (0.93, 1.20) | 0.381 | 0.99 (0.90, 1.09) | 0.866 |  |
| Chronic kidney disease | 1.28 (1.19, 1.37) | < 0.001 | 1.24 (1.11, 1.39) | < 0.001 | 1.29 (1.19, 1.41) | < 0.001 |  |
| Any anticoagulant | 1.01 (0.94, 1.09) | 0.793 | 0.98 (0.86, 1.10) | 0.696 | 1.02 (0.93, 1.11) | 0.749 |  |
| Vitamin D or Calcium | 0.92 (0.68, 1.25) | 0.588 | 0.74 (0.44, 1.26) | 0.268 | 1.03 (0.71, 1.5) | 0.881 |  |
| Bisphosphonate | 0.79 (0.59, 1.06) | 0.118 | 0.62 (0.37, 1.02) | 0.062 | 0.92 (0.65, 1.32) | 0.659 |  |
| Osteoporosis | 0.99 (0.92, 1.06) | 0.693 | 1.00 (0.89, 1.12) | 0.986 | 0.98 (0.89, 1.07) | 0.603 |  |
| Any osteoporosis medication | 1.25 (0.90, 1.73) | 0.179 | 1.72 (0.99, 3.00) | 0.056 | 1.04 (0.70. 1.56) | 0.830 |  |
| Outpatient sector | 0.50 (0.46, 0.55) | < 0.001 | 0.79 (0.26, 2.47) | 0.692 | 0.42 (0.38, 0.46) | < 0.001 |  |
| Treatment change within 21 days after diagnosis | 0.73 (0.57, 0.94) | 0.014 | 0.86 (0.67, 1.12) | 0.264 |  |  |  |
| Thromboembolic event within 21 days after diagnosis | 1.32 (0.57, 3.05) | 0.521 | 0.34 (0.04, 2.95) | 0.325 | 1.83 (0.72. 4.63) | 0.202 |  |
| Injury-related event within 21 days after diagnosis | 0.72 (0.55, 0.94) | 0.015 | 0.91 (0.56, 1.47) | 0.694 | 0.59 (0.43. 0.82) | 0.002 |  |
| Major adverse event within 21 days after diagnosis | 2.05 (1.23, 3.41) | 0.006 | 3.53 (1.33, 9.37) | 0.011 | 1.59 (0.88. 2.90) | 0.126 |  |
| Minor outpatient event within 21 days after diagnosis | 0.72 (0.54, 0.95) | 0.019 | 0.55 (0.26, 1.15) | 0.112 | 0.76 (0.56. 1.03) | 0.075 |  |

Table S9: Results of the Cox regression models with major adverse event as an outcome for the overall cohort, the subgroup of those who underwent surgery within 21 days of PHF diagnosis, and those who did not. Included variables are current GTMK at the time of PHF diagnosis, patient (risk) profile, and events that occurred within 21 days of PHF diagnosis, with an end of follow-up 3 months after the start of observation. The difference between operative and non-operative treatment within individual GTMK is quantified with the interaction p value . This comes from a Cox regression which, in addition to the influencing factors listed here, also includes the interaction between operation and the individual GTMK.

| **Major adverse event (MAE)** | | | | | | | |
| --- | --- | --- | --- | --- | --- | --- | --- |
|  | **Total cohort** | | **Subgroup:  Operative Treatment** | | **Subgroup:  Non-Operative Treatment** | | **OP vs no OP** |
| **Variable** | **HR (95%-CI)** | **p** | **HR (95%-CI)** | **p** | **HR (95%-CI)** | **p** | **Pint** |
| Immobility | 1.05 (0.95, 1.16) | 0.356 | 1.11 (0.94, 1.31) | 0.202 | 1.00 (0.88, 1.13) | 0.981 | 0.228 |
| Falling tendency | 1.02 (0.97, 1.08) | 0.386 | 1.00 (0.92, 1.08) | 0.947 | 1.04 (0.97, 1.11) | 0.290 | 0.940 |
| Cognitive deficits | 1.05 (0.96, 1.14) | 0.267 | 1.07 (0.94, 1.23) | 0.293 | 1.04 (0.93, 1.15) | 0.498 | <0.001 |
| Incontinence | 1.14 (1.08, 1.20) | < 0.001 | 1.11 (1.02, 1.21) | 0.021 | 1.15 (1.07, 1.23) | < 0.001 | 0.963 |
| Decubital ulcers | 1.42 (1.33, 1.51) | < 0.001 | 1.30 (1.17, 1.45) | < 0.001 | 1.48 (1.37, 1.60) | < 0.001 | 0.259 |
| Malnutrition and malnourishment | 1.57 (1.43, 1.73) | < 0.001 | 1.53 (1.31, 1.79) | < 0.001 | 1.59 (1.42, 1.79) | < 0.001 | 0.660 |
| Fluids and electrolytes disorders | 1.35 (1.28, 1.42) | < 0.001 | 1.28 (1.18, 1.40) | < 0.001 | 1.37 (1.28, 1.48) | < 0.001 | 0.759 |
| Depression and anxiety disorders | 1.01 (0.96, 1.06) | 0.714 | 0.98 (0.90, 1.06) | 0.596 | 1.02 (0.96, 1.10) | 0.476 | 0.271 |
| Pain | 0.94 (0.90, 0.99) | 0.031 | 0.97 (0.89, 1.05) | 0.468 | 0.92 (0.86, 0.99) | 0.020 | 0.378 |
| Sensory disorders | 0.92 (0.87, 0.97) | 0.002 | 0.90 (0.82, 0.98) | 0.016 | 0.93 (0.87, 1.00) | 0.059 | 0.621 |
| Frailty | 1.04 (0.98, 1.11) | 0.218 | 1.06 (0.96, 1.18) | 0.233 | 1.03 (0.95, 1.11) | 0.509 | 0.233 |
| Severe visual and hearing impairment | 0.82 (0.79, 0.87) | < 0.001 | 0.86 (0.80, 0.93) | < 0.001 | 0.81 (0.76, 0.86) | < 0.001 | 0.108 |
| Medication problems | 1.10 (0.91, 1.34) | 0.324 | 1.03 (0.74, 1.44) | 0.855 | 1.12 (0.88, 1.43) | 0.366 | 0.798 |
| High risk of complications | 0.78 (0.73, 0.83) | < 0.001 | 0.75 (0.68, 0.82) | < 0.001 | 0.81 (0.74, 0.88) | < 0.001 | 0.461 |
| Delayed convalescence | 0.89 (0.69, 1.17) | 0.412 | 0.97 (0.65, 1.44) | 0.867 | 0.87 (0.61, 1.25) | 0.451 | 0.741 |
| Age in years at PHF diagnosis | 1.06 (1.05, 1.06) | < 0.001 | 1.06 (1.06, 1.07) | < 0.001 | 1.05 (1.04, 1.05) | < 0.001 |  |
| Female Sex | 0.63 (0.59, 0.66) | < 0.001 | 0.61 (0.55, 0.67) | < 0.001 | 0.65 (0.60, 0.70) | < 0.001 |  |
| Cancer | 1.10 (1.05, 1.16) | < 0.001 | 1.05 (0.96, 1.14) | 0.277 | 1.14 (1.07, 1.22) | < 0.001 |  |
| Diabetes | 1.23 (1.16, 1.29) | < 0.001 | 1.28 (1.18, 1.39) | < 0.001 | 1.19 (1.11, 1.28) | < 0.001 |  |
| Dementia | 1.42 (1.31, 1.55) | < 0.001 | 1.57 (1.38, 1.79) | < 0.001 | 1.31 (1.18, 1.46) | < 0.001 |  |
| Chronic polyarthritis | 1.06 (0.96, 1.17) | 0.223 | 1.05 (0.90, 1.23) | 0.531 | 1.06 (0.93, 1.20) | 0.379 |  |
| Obesity | 0.94 (0.88, 1.00) | 0.052 | 0.94 (0.85, 1.04) | 0.247 | 0.94 (0.86, 1.02) | 0.162 |  |
| Nicotine abuse | 1.46 (1.33, 1.60) | < 0.001 | 1.46 (1.26, 1.68) | < 0.001 | 1.46 (1.30, 1.65) | < 0.001 |  |
| Parkinson | 1.03 (0.93, 1.14) | 0.555 | 1.20 (1.03, 1.40) | 0.017 | 0.91 (0.8, 1.04) | 0.173 |  |
| Rotator cuff rupture | 0.65 (0.53, 0.80) | < 0.001 | 0.72 (0.56, 0.92) | 0.009 | 0.62 (0.42, 0.93) | 0.019 |  |
| Alcohol abuse | 1.54 (1.39, 1.69) | < 0.001 | 1.63 (1.41, 1.88) | < 0.001 | 1.47 (1.29, 1.68) | < 0.001 |  |
| Previous stroke | 1.11 (1.05, 1.17) | < 0.001 | 1.10 (1.01, 1.20) | 0.024 | 1.10 (1.03, 1.18) | 0.005 |  |
| Omarthrosis | 0.93 (0.80, 1.07) | 0.306 | 0.82 (0.63, 1.07) | 0.140 | 0.99 (0.82, 1.18) | 0.880 |  |
| Frozen shoulder | 0.86 (0.75, 0.99) | 0.035 | 0.89 (0.71, 1.10) | 0.284 | 0.85 (0.72, 1.02) | 0.076 |  |
| Atrial fibrillation and atrial flutter | 1.46 (1.37, 1.55) | < 0.001 | 1.47 (1.34, 1.62) | < 0.001 | 1.43 (1.33, 1.55) | < 0.001 |  |
| Congestive heart failure | 1.33 (1.26, 1.40) | < 0.001 | 1.37 (1.25, 1.49) | < 0.001 | 1.29 (1.20, 1.39) | < 0.001 |  |
| Coronary heart disease | 1.04 (0.99, 1.10) | 0.126 | 1.09 (1.00, 1.18) | 0.058 | 1.01 (0.94, 1.09) | 0.721 |  |
| Hypertonus | 1.04 (0.95, 1.14) | 0.377 | 1.00 (0.88, 1.15) | 0.969 | 1.07 (0.95, 1.20) | 0.246 |  |
| Atherosclerosis | 1.02 (0.96, 1.09) | 0.459 | 1.06 (0.96, 1.16) | 0.250 | 1.00 (0.93, 1.08) | 0.958 |  |
| Chronic kidney disease | 1.50 (1.43, 1.59) | < 0.001 | 1.55 (1.43, 1.69) | < 0.001 | 1.47 (1.37, 1.57) | < 0.001 |  |
| Any anticoagulant | 1.05 (0.99, 1.11) | 0.124 | 1.03 (0.94, 1.13) | 0.479 | 1.04 (0.97, 1.12) | 0.289 |  |
| Vitamin D or Calcium | 0.93 (0.73, 1.17) | 0.525 | 0.83 (0.57, 1.21) | 0.345 | 1.00 (0.74, 1.36) | 0.999 |  |
| Bisphosphonate | 0.77 (0.61, 0.96) | 0.022 | 0.69 (0.48, 0.99) | 0.047 | 0.84 (0.63, 1.12) | 0.225 |  |
| Osteoporosis | 0.96 (0.91, 1.02) | 0.198 | 0.97 (0.89, 1.06) | 0.499 | 0.96 (0.89, 1.03) | 0.259 |  |
| Any osteoporosis medication | 1.26 (0.98, 1.63) | 0.068 | 1.52 (1.02, 2.27) | 0.040 | 1.11 (0.80, 1.53) | 0.547 |  |
| Outpatient sector | 0.46 (0.43, 0.49) | < 0.001 | 1.19 (0.59, 2.38) | 0.626 | 0.38 (0.36, 0.41) | < 0.001 |  |
| Treatment change within 21 days after diagnosis | 0.95 (0.81, 1.12) | 0.544 | 1.08 (0.92, 1.28) | 0.340 |  |  |  |
| Thromboembolic event within 21 days after diagnosis | 1.66 (0.96, 2.87) | 0.070 | 1.04 (0.28, 3.94) | 0.950 | 1.77 (0.96, 3.25) | 0.066 |  |
| Injury-related event within 21 days after diagnosis | 0.77 (0.63, 0.94) | 0.009 | 0.96 (0.69, 1.34) | 0.811 | 0.63 (0.50, 0.80) | < 0.001 |  |
| Major adverse event within 21 days after diagnosis | 2.87 (2.02, 4.06) | < 0.001 | 2.77 (1.28, 5.98) | 0.010 | 2.66 (1.80, 3.95) | < 0.001 |  |
| Minor outpatient event within 21 days after diagnosis | 0.70 (0.56, 0.86) | 0.001 | 0.68 (0.43, 1.08) | 0.105 | 0.69 (0.55, 0.88) | 0.003 |  |

Table S10: Results of the Cox regression models with thromboembolic event as an outcome for the overall cohort, the subgroup of those who underwent surgery within 21 days of PHF diagnosis, and those who did not. Included variables are current GTMK at the time of PHF diagnosis, patient (risk) profile, and events that occurred within 21 days of PHF diagnosis, with an end of follow-up 3 months after the start of observation. The difference between operative and non-operative treatment within individual GTMK is quantified with the interaction p value . This comes from a Cox regression which, in addition to the influencing factors listed here, also includes the interaction between operation and the individual GTMK.

| **Thromboembolic event (TE)** | | | | | | | |
| --- | --- | --- | --- | --- | --- | --- | --- |
|  | **Total cohort** | | **Subgroup:  Operative Treatment** | | **Subgroup:  Non-Operative Treatment** | | **OP vs no OP** |
| **Variable** | **HR (95%-CI)** | **p** | **HR (95%-CI)** | **p** | **HR (95%-CI)** | **p** | **Pint** |
| Immobility | 1.04 (0.93, 1.16) | 0.473 | 1.05 (0.87, 1.27) | 0.639 | 1.02 (0.89, 1.17) | 0.735 | 0.769 |
| Falling tendency | 1.01 (0.95, 1.07) | 0.694 | 0.93 (0.84, 1.02) | 0.134 | 1.06 (0.99, 1.15) | 0.116 | 0.099 |
| Cognitive deficits | 1.12 (1.02, 1.23) | 0.018 | 1.13 (0.97, 1.32) | 0.110 | 1.12 (0.99, 1.25) | 0.065 | 0.002 |
| Incontinence | 1.19 (1.12, 1.26) | < 0.001 | 1.12 (1.02, 1.24) | 0.021 | 1.21 (1.12, 1.31) | < 0.001 | 0.564 |
| Decubital ulcers | 1.41 (1.32, 1.52) | < 0.001 | 1.29 (1.14, 1.45) | < 0.001 | 1.48 (1.36, 1.62) | < 0.001 | 0.152 |
| Malnutrition and malnourishment | 1.58 (1.42, 1.75) | < 0.001 | 1.55 (1.30, 1.85) | < 0.001 | 1.59 (1.40, 1.81) | < 0.001 | 0.891 |
| Fluids and electrolytes disorders | 1.32 (1.24, 1.40) | < 0.001 | 1.29 (1.17, 1.42) | < 0.001 | 1.32 (1.22, 1.43) | < 0.001 | 0.951 |
| Depression and anxiety disorders | 1.01 (0.95, 1.07) | 0.808 | 1.02 (0.93, 1.12) | 0.697 | 1.00 (0.92, 1.07) | 0.920 | 0.720 |
| Pain | 0.94 (0.89, 1.00) | 0.051 | 0.98 (0.89, 1.07) | 0.648 | 0.92 (0.85, 0.99) | 0.026 | 0.303 |
| Sensory disorders | 0.91 (0.85, 0.96) | 0.002 | 0.89 (0.80, 0.99) | 0.026 | 0.92 (0.85, 1.00) | 0.048 | 0.449 |
| Frailty | 1.04 (0.97, 1.11) | 0.285 | 1.08 (0.97, 1.21) | 0.177 | 1.01 (0.93, 1.11) | 0.760 | 0.156 |
| Severe visual and hearing impairment | 0.83 (0.79, 0.88) | < 0.001 | 0.84 (0.77, 0.92) | < 0.001 | 0.83 (0.77, 0.89) | < 0.001 | 0.587 |
| Medication problems | 1.22 (0.98, 1.51) | 0.081 | 1.00 (0.67, 1.49) | 0.991 | 1.31 (1.01, 1.71) | 0.042 | 0.303 |
| High risk of complications | 0.79 (0.73, 0.84) | < 0.001 | 0.76 (0.68, 0.84) | < 0.001 | 0.81 (0.74, 0.89) | < 0.001 | 0.425 |
| Delayed convalescence | 1.09 (0.83, 1.44) | 0.545 | 1.11 (0.71, 1.71) | 0.652 | 1.12 (0.79, 1.61) | 0.521 | 0.922 |
| Age in years at PHF diagnosis | 1.07 (1.07, 1.08) | < 0.001 | 1.08 (1.07, 1.09) | < 0.001 | 1.06 (1.06, 1.07) | < 0.001 |  |
| Female Sex | 0.65 (0.61, 0.7) | < 0.001 | 0.68 (0.61, 0.76) | < 0.001 | 0.65 (0.60, 0.71) | < 0.001 |  |
| Cancer | 1.12 (1.06, 1.19) | < 0.001 | 1.09 (0.99, 1.19) | 0.089 | 1.15 (1.07, 1.24) | < 0.001 |  |
| Diabetes | 1.17 (1.10, 1.24) | < 0.001 | 1.19 (1.08, 1.31) | < 0.001 | 1.16 (1.07, 1.25) | < 0.001 |  |
| Dementia | 1.50 (1.37, 1.65) | < 0.001 | 1.69 (1.45, 1.96) | < 0.001 | 1.37 (1.22, 1.54) | < 0.001 |  |
| Chronic polyarthritis | 1.04 (0.92, 1.16) | 0.543 | 1.02 (0.85, 1.23) | 0.833 | 1.03 (0.90, 1.19) | 0.640 |  |
| Obesity | 0.89 (0.82, 0.96) | 0.002 | 0.90 (0.80, 1.02) | 0.096 | 0.88 (0.80, 0.97) | 0.014 |  |
| Nicotine abuse | 1.50 (1.35, 1.67) | < 0.001 | 1.49 (1.26, 1.77) | < 0.001 | 1.50 (1.31, 1.73) | < 0.001 |  |
| Parkinson | 1.06 (0.95, 1.19) | 0.269 | 1.18 (0.99, 1.40) | 0.066 | 0.98 (0.85, 1.13) | 0.819 |  |
| Rotator cuff rupture | 0.56 (0.43, 0.72) | < 0.001 | 0.66 (0.49, 0.89) | 0.006 | 0.44 (0.26, 0.75) | 0.002 |  |
| Alcohol abuse | 1.43 (1.27, 1.61) | < 0.001 | 1.58 (1.33, 1.88) | < 0.001 | 1.33 (1.13, 1.55) | < 0.001 |  |
| Previous stroke | 1.13 (1.06, 1.20) | < 0.001 | 1.15 (1.04, 1.27) | 0.004 | 1.10 (1.02, 1.19) | 0.012 |  |
| Omarthrosis | 0.93 (0.78, 1.10) | 0.398 | 0.80 (0.58, 1.09) | 0.15 | 1.00 (0.82, 1.23) | 0.983 |  |
| Frozen shoulder | 0.84 (0.71, 0.98) | 0.027 | 0.86 (0.67, 1.12) | 0.263 | 0.82 (0.67, 1.00) | 0.052 |  |
| Atrial fibrillation and atrial flutter | 1.37 (1.28, 1.47) | < 0.001 | 1.41 (1.26, 1.57) | < 0.001 | 1.34 (1.23, 1.46) | < 0.001 |  |
| Congestive heart failure | 1.26 (1.18, 1.34) | < 0.001 | 1.26 (1.14, 1.4) | < 0.001 | 1.24 (1.15, 1.35) | < 0.001 |  |
| Coronary heart disease | 1.03 (0.97, 1.09) | 0.376 | 1.10 (1.00, 1.22) | 0.055 | 0.98 (0.91, 1.06) | 0.631 |  |
| Hypertonus | 0.97 (0.88, 1.06) | 0.518 | 0.92 (0.8, 1.07) | 0.269 | 1.01 (0.89, 1.14) | 0.906 |  |
| Atherosclerosis | 1.03 (0.96, 1.11) | 0.361 | 1.05 (0.94, 1.17) | 0.378 | 1.02 (0.94, 1.11) | 0.634 |  |
| Chronic kidney disease | 1.23 (1.15, 1.3) | < 0.001 | 1.18 (1.07, 1.30) | 0.001 | 1.26 (1.16, 1.36) | < 0.001 |  |
| Any anticoagulant | 1.04 (0.97, 1.11) | 0.231 | 1.01 (0.91, 1.12) | 0.871 | 1.05 (0.96, 1.14) | 0.282 |  |
| Vitamin D or Calcium | 0.94 (0.72, 1.22) | 0.624 | 0.82 (0.54, 1.27) | 0.377 | 1.01 (0.73, 1.41) | 0.947 |  |
| Bisphosphonate | 0.82 (0.64, 1.05) | 0.113 | 0.67 (0.44, 1.01) | 0.055 | 0.94 (0.69, 1.29) | 0.708 |  |
| Osteoporosis | 0.98 (0.93, 1.05) | 0.628 | 1.00 (0.91, 1.11) | 0.987 | 0.97 (0.90, 1.06) | 0.521 |  |
| Any osteoporosis medication | 1.2 (0.91, 1.59) | 0.199 | 1.54 (0.98, 2.44) | 0.064 | 1.03 (0.72, 1.47) | 0.888 |  |
| Outpatient sector | 0.48 (0.45, 0.52) | < 0.001 | 1.12 (0.5, 2.51) | 0.774 | 0.41 (0.38, 0.45) | < 0.001 |  |
| Treatment change within 21 days after diagnosis | 0.79 (0.64, 0.97) | 0.024 | 0.91 (0.73, 1.12) | 0.363 |  |  |  |
| Thromboembolic event within 21 days after diagnosis | 3.22 (1.73, 6.01) | < 0.001 | 1.7 (0.42, 6.86) | 0.455 | 3.85 (1.88, 7.86) | < 0.001 |  |
| Injury-related event within 21 days after diagnosis | 0.74 (0.59, 0.93) | 0.010 | 0.77 (0.5, 1.18) | 0.23 | 0.67 (0.51, 0.88) | 0.003 |  |
| Major adverse event within 21 days after diagnosis | 1.92 (1.2, 3.06) | 0.006 | 2.75 (1.1, 6.86) | 0.03 | 1.54 (0.89, 2.68) | 0.121 |  |
| Minor outpatient event within 21 days after diagnosis | 0.79 (0.63, 0.99) | 0.040 | 0.86 (0.53, 1.39) | 0.547 | 0.77 (0.6, 1) | 0.052 |  |

Table S11: Results of the Cox regression models with ijury- or surgical related complication as an outcome and death as competing event for the overall cohort, the subgroup of those who underwent surgery within 21 days of PHF diagnosis, and those who did not. Included variables are current GTMK at the time of PHF diagnosis, patient (risk) profile, and events that occurred within 21 days of PHF diagnosis, with an end of follow-up 3 months after the start of observation. The difference between operative and non-operative treatment within individual GTMK is quantified with the interaction p value . This comes from a Cox regression which, in addition to the influencing factors listed here, also includes the interaction between operation and the individual GTMK.

| **Injury- or surgical related complication (SC)** | | | | | | | |
| --- | --- | --- | --- | --- | --- | --- | --- |
|  | **Total cohort** | | **Subgroup:  Operative Treatment** | | **Subgroup:  Non-Operative Treatment** | | **OP vs no OP** |
| **Variable** | **HR (95%-CI)** | **p** | **HR (95%-CI)** | **p** | **HR (95%-CI)** | **p** | **Pint** |
| Immobility | 0.94 (0.79, 1.13) | 0.542 | 0.98 (0.76, 1.27) | 0.892 | 0.89 (0.69, 1.15) | 0.378 | 0.438 |
| Falling tendency | 0.98 (0.91, 1.05) | 0.536 | 0.95 (0.86, 1.06) | 0.359 | 1.00 (0.90, 1.10) | 0.935 | 0.715 |
| Cognitive deficits | 0.96 (0.84, 1.10) | 0.567 | 1.10 (0.91, 1.31) | 0.322 | 0.84 (0.69, 1.03) | 0.095 | < 0.001 |
| Incontinence | 0.98 (0.9, 1.06) | 0.574 | 1.03 (0.92, 1.15) | 0.636 | 0.93 (0.83, 1.04) | 0.204 | 0.075 |
| Decubital ulcers | 0.98 (0.87, 1.10) | 0.717 | 1.08 (0.92, 1.27) | 0.342 | 0.87 (0.73, 1.03) | 0.097 | 0.009 |
| Malnutrition and malnourishment | 0.94 (0.77, 1.16) | 0.571 | 0.81 (0.60, 1.11) | 0.189 | 1.05 (0.80, 1.39) | 0.719 | 0.226 |
| Fluids and electrolytes disorders | 1.06 (0.98, 1.15) | 0.118 | 1.06 (0.95, 1.19) | 0.271 | 1.05 (0.94, 1.17) | 0.407 | 0.488 |
| Depression and anxiety disorders | 1.07 (0.99, 1.14) | 0.070 | 1.1 (0.99, 1.21) | 0.066 | 1.02 (0.93, 1.13) | 0.662 | 0.647 |
| Pain | 1.11 (1.04, 1.19) | 0.003 | 1.01 (0.91, 1.11) | 0.908 | 1.24 (1.12, 1.36) | < 0.001 | < 0.001 |
| Sensory disorders | 1.07 (0.99, 1.15) | 0.079 | 1.03 (0.93, 1.15) | 0.534 | 1.10 (0.99, 1.22) | 0.071 | 0.075 |
| Frailty | 0.93 (0.83, 1.03) | 0.138 | 0.94 (0.82, 1.09) | 0.438 | 0.90 (0.78, 1.05) | 0.174 | 0.073 |
| Severe visual and hearing impairment | 0.94 (0.88, 1.00) | 0.049 | 0.88 (0.80, 0.96) | 0.004 | 1.01 (0.92, 1.11) | 0.804 | 0.130 |
| Medication problems | 0.89 (0.62, 1.28) | 0.530 | 1.12 (0.71, 1.77) | 0.632 | 0.58 (0.31, 1.09) | 0.090 | 0.088 |
| High risk of complications | 1.03 (0.96, 1.12) | 0.383 | 0.95 (0.85, 1.05) | 0.309 | 1.16 (1.04, 1.30) | 0.008 | 0.009 |
| Delayed convalescence | 1.49 (1.02, 2.18) | 0.041 | 1.54 (0.93, 2.54) | 0.090 | 1.35 (0.75, 2.46) | 0.321 | 0.721 |
| Age in years at PHF diagnosis | 1.00 (0.99, 1.00) | 0.467 | 1.01 (1.01, 1.02) | < 0.001 | 0.98 (0.98, 0.99) | < 0.001 |  |
| Female Sex | 0.78 (0.72, 0.85) | < 0.001 | 0.60 (0.54, 0.68) | < 0.001 | 1.06 (0.94, 1.20) | 0.359 |  |
| Cancer | 1.04 (0.97, 1.12) | 0.246 | 1.02 (0.92, 1.12) | 0.765 | 1.06 (0.96, 1.17) | 0.262 |  |
| Diabetes | 1.01 (0.94, 1.08) | 0.817 | 1.01 (0.91, 1.12) | 0.84 | 1.01 (0.91, 1.12) | 0.901 |  |
| Dementia | 1.03 (0.90, 1.18) | 0.689 | 1.08 (0.90, 1.30) | 0.413 | 0.96 (0.78, 1.19) | 0.719 |  |
| Chronic polyarthritis | 0.98 (0.86, 1.11) | 0.732 | 0.89 (0.74, 1.08) | 0.257 | 1.06 (0.89, 1.26) | 0.499 |  |
| Obesity | 1.17 (1.08, 1.26) | < 0.001 | 1.09 (0.97, 1.21) | 0.139 | 1.28 (1.15, 1.43) | < 0.001 |  |
| Nicotine abuse | 1.12 (1.00, 1.26) | 0.046 | 1.04 (0.89, 1.23) | 0.6 | 1.22 (1.04, 1.44) | 0.017 |  |
| Parkinson | 1.31 (1.14, 1.52) | < 0.001 | 1.25 (1.03, 1.52) | 0.027 | 1.34 (1.08, 1.65) | 0.007 |  |
| Rotator cuff rupture | 1.49 (1.27, 1.75) | < 0.001 | 1.27 (1.01, 1.60) | 0.04 | 1.78 (1.4, 2.27) | < 0.001 |  |
| Alcohol abuse | 1.50 (1.34, 1.69) | < 0.001 | 1.32 (1.13, 1.55) | 0.001 | 1.81 (1.52, 2.15) | < 0.001 |  |
| Previous stroke | 0.92 (0.85, 0.99) | 0.027 | 0.94 (0.84, 1.05) | 0.266 | 0.89 (0.80, 1.00) | 0.041 |  |
| Omarthrosis | 1.00 (0.83, 1.20) | 0.978 | 0.84 (0.62, 1.16) | 0.29 | 1.08 (0.87, 1.36) | 0.484 |  |
| Frozen shoulder | 1.06 (0.91, 1.22) | 0.463 | 0.95 (0.75, 1.20) | 0.659 | 1.15 (0.95, 1.39) | 0.155 |  |
| Atrial fibrillation and atrial flutter | 1.08 (0.98, 1.18) | 0.126 | 1.07 (0.93, 1.22) | 0.346 | 1.07 (0.94, 1.22) | 0.315 |  |
| Congestive heart failure | 1.10 (1.02, 1.20) | 0.017 | 1.15 (1.02, 1.28) | 0.017 | 1.04 (0.93, 1.17) | 0.499 |  |
| Coronary heart disease | 0.98 (0.91, 1.06) | 0.655 | 0.95 (0.85, 1.06) | 0.331 | 1.01 (0.91, 1.13) | 0.825 |  |
| Hypertonus | 1.11 (1.01, 1.22) | 0.036 | 1.08 (0.94, 1.24) | 0.274 | 1.14 (1.00, 1.30) | 0.054 |  |
| Atherosclerosis | 0.98 (0.90, 1.07) | 0.669 | 1.01 (0.89, 1.14) | 0.936 | 0.96 (0.85, 1.09) | 0.534 |  |
| Chronic kidney disease | 1.09 (1.00, 1.17) | 0.042 | 1.12 (1.01, 1.25) | 0.035 | 1.02 (0.91, 1.15) | 0.702 |  |
| Any anticoagulant | 1.03 (0.95, 1.12) | 0.512 | 1.00 (0.89, 1.13) | 0.969 | 1.05 (0.93, 1.18) | 0.415 |  |
| Vitamin D or Calcium | 0.99 (0.76, 1.31) | 0.964 | 0.95 (0.65, 1.40) | 0.81 | 1.11 (0.75, 1.65) | 0.591 |  |
| Bisphosphonate | 1.10 (0.84, 1.45) | 0.483 | 1.15 (0.78, 1.69) | 0.495 | 1.11 (0.76, 1.64) | 0.582 |  |
| Osteoporosis | 1.08 (1.00, 1.17) | 0.038 | 1.03 (0.93, 1.14) | 0.591 | 1.14 (1.02, 1.26) | 0.018 |  |
| Any osteoporosis medication | 0.95 (0.7, 1.3) | 0.767 | 1 (0.65, 1.54) | 0.994 | 0.84 (0.55, 1.30) | 0.445 |  |
| Outpatient sector | 1.06 (0.98, 1.15) | 0.129 | 1.2 (0.45, 3.21) | 0.713 | 0.79 (0.72, 0.87) | < 0.001 |  |
| Treatment change within 21 days after diagnosis | 16.52 (15.26, 17.89) | < 0.001 | 21.02 (19.2, 23.02) | < 0.001 |  |  |  |
| Thromboembolic event within 21 days after diagnosis | 0.93 (0.25, 3.54) | 0.921 | 6.41 (0.39, 105.41) | 0.194 | 0.60 (0.13, 2.84) | 0.517 |  |
| Injury-related event within 21 days after diagnosis | 1.37 (1.13, 1.66) | 0.001 | 1.24 (0.9, 1.7) | 0.182 | 1.19 (0.93, 1.53) | 0.163 |  |
| Major adverse event within 21 days after diagnosis | 2.67 (1.28, 5.55) | 0.008 | 0.56 (0.03, 9.21) | 0.686 | 2.95 (1.41, 6.19) | 0.004 |  |
| Minor outpatient event within 21 days after diagnosis | 1.31 (1.12, 1.53) | 0.001 | 0.64 (0.41, 1) | 0.052 | 1.40 (1.16, 1.68) | < 0.001 |  |

Table S12: Results of the Cox regression models with minor outpatient complication as an outcome and death as competing event for the overall cohort, the subgroup of those who underwent surgery within 21 days of PHF diagnosis, and those who did not. Included variables are current GTMK at the time of PHF diagnosis, patient (risk) profile, and events that occurred within 21 days of PHF diagnosis, with an end of follow-up 3 months after the start of observation. The difference between operative and non-operative treatment within individual GTMK is quantified with the interaction p value . This comes from a Cox regression which, in addition to the influencing factors listed here, also includes the interaction between operation and the individual GTMK.

| **Minor outpatient complication (MOC)** | | | | | | | |
| --- | --- | --- | --- | --- | --- | --- | --- |
|  | **Total cohort** | | **Subgroup:  Operative Treatment** | | **Subgroup:  Non-Operative Treatment** | | **OP vs no OP** |
| **Variable** | **HR (95%-CI)** | **p** | **HR (95%-CI)** | **p** | **HR (95%-CI)** | **p** | **Pint** |
| Immobility | 0.95 (0.84, 1.06) | 0.357 | 0.97 (0.81, 1.15) | 0.699 | 0.94 (0.81, 1.09) | 0.405 | 0.767 |
| Falling tendency | 1.07 (1.02, 1.11) | 0.004 | 1.04 (0.98, 1.11) | 0.200 | 1.08 (1.02, 1.14) | 0.006 | 0.809 |
| Cognitive deficits | 0.91 (0.84, 1.00) | 0.047 | 0.94 (0.83, 1.08) | 0.400 | 0.89 (0.79, 1.01) | 0.063 | 0.252 |
| Incontinence | 0.96 (0.92, 1.01) | 0.105 | 0.98 (0.91, 1.06) | 0.648 | 0.95 (0.89, 1.01) | 0.116 | 0.316 |
| Decubital ulcers | 0.85 (0.79, 0.92) | < 0.001 | 0.87 (0.77, 0.98) | 0.019 | 0.85 (0.76, 0.94) | 0.002 | 0.639 |
| Malnutrition and malnourishment | 0.82 (0.71, 0.94) | 0.006 | 0.76 (0.60, 0.95) | 0.016 | 0.86 (0.72, 1.04) | 0.121 | 0.379 |
| Fluids and electrolytes disorders | 0.93 (0.89, 0.98) | 0.006 | 1.01 (0.94, 1.09) | 0.718 | 0.88 (0.82, 0.94) | < 0.001 | < 0.001 |
| Depression and anxiety disorders | 1.07 (1.03, 1.12) | 0.001 | 1.05 (0.99, 1.12) | 0.120 | 1.09 (1.03, 1.15) | 0.001 | 0.326 |
| Pain | 1.28 (1.23, 1.33) | < 0.001 | 1.23 (1.16, 1.31) | < 0.001 | 1.32 (1.25, 1.39) | < 0.001 | 0.069 |
| Sensory disorders | 1.23 (1.18, 1.28) | < 0.001 | 1.20 (1.12, 1.28) | < 0.001 | 1.25 (1.18, 1.32) | < 0.001 | 0.550 |
| Frailty | 0.97 (0.91, 1.04) | 0.406 | 0.97 (0.88, 1.07) | 0.523 | 0.98 (0.90, 1.06) | 0.582 | 0.686 |
| Severe visual and hearing impairment | 1.12 (1.07, 1.16) | < 0.001 | 1.09 (1.02, 1.15) | 0.006 | 1.14 (1.08, 1.20) | < 0.001 | 0.366 |
| Medication problems | 1.09 (0.87, 1.36) | 0.449 | 1.06 (0.76, 1.47) | 0.741 | 1.1 (0.82, 1.48) | 0.524 | 0.916 |
| High risk of complications | 1.21 (1.16, 1.27) | < 0.001 | 1.22 (1.14, 1.31) | < 0.001 | 1.22 (1.14, 1.29) | < 0.001 | 0.773 |
| Delayed convalescence | 1.1 (0.83, 1.47) | 0.493 | 1.24 (0.84, 1.83) | 0.274 | 0.98 (0.64, 1.49) | 0.909 | 0.423 |
| Age in years at PHF diagnosis | 0.98 (0.98, 0.98) | < 0.001 | 0.98 (0.98, 0.99) | < 0.001 | 0.97 (0.97, 0.98) | < 0.001 |  |
| Female Sex | 0.93 (0.89, 0.99) | 0.013 | 0.94 (0.86, 1.02) | 0.123 | 0.93 (0.86, 0.99) | 0.026 |  |
| Cancer | 1.04 (0.99, 1.08) | 0.094 | 1.04 (0.98, 1.11) | 0.19 | 1.03 (0.97, 1.09) | 0.292 |  |
| Diabetes | 0.95 (0.9, 0.99) | 0.013 | 0.99 (0.92, 1.05) | 0.699 | 0.91 (0.86, 0.97) | 0.003 |  |
| Dementia | 0.82 (0.75, 0.90) | < 0.001 | 0.83 (0.72, 0.96) | 0.011 | 0.83 (0.73, 0.94) | 0.003 |  |
| Chronic polyarthritis | 1.05 (0.98, 1.12) | 0.199 | 1.02 (0.91, 1.14) | 0.72 | 1.07 (0.97, 1.17) | 0.162 |  |
| Obesity | 1.11 (1.06, 1.17) | < 0.001 | 1.15 (1.08, 1.24) | < 0.001 | 1.08 (1.01, 1.15) | 0.017 |  |
| Nicotine abuse | 0.94 (0.87, 1.01) | 0.101 | 1.01 (0.91, 1.13) | 0.797 | 0.89 (0.80, 0.98) | 0.023 |  |
| Parkinson | 0.89 (0.80, 0.99) | 0.038 | 0.84 (0.71, 0.99) | 0.039 | 0.95 (0.82, 1.09) | 0.428 |  |
| Rotator cuff rupture | 1.92 (1.78, 2.08) | < 0.001 | 2.23 (2.00, 2.50) | < 0.001 | 1.69 (1.53, 1.87) | < 0.001 |  |
| Alcohol abuse | 0.93 (0.85, 1.02) | 0.135 | 0.98 (0.87, 1.11) | 0.757 | 0.88 (0.77, 1.00) | 0.045 |  |
| Previous stroke | 1.07 (1.02, 1.12) | 0.003 | 1.13 (1.05, 1.21) | 0.001 | 1.04 (0.98, 1.10) | 0.240 |  |
| Omarthrosis | 1.74 (1.61, 1.88) | < 0.001 | 1.72 (1.51, 1.96) | < 0.001 | 1.77 (1.61, 1.95) | < 0.001 |  |
| Frozen shoulder | 3.24 (3.07, 3.43) | < 0.001 | 3.43 (3.13, 3.74) | < 0.001 | 3.14 (2.92, 3.37) | < 0.001 |  |
| Atrial fibrillation and atrial flutter | 0.90 (0.84, 0.95) | < 0.001 | 0.9 (0.82, 0.99) | 0.027 | 0.89 (0.83, 0.97) | 0.006 |  |
| Congestive heart failure | 1.00 (0.95, 1.05) | 0.856 | 1.03 (0.96, 1.12) | 0.395 | 0.97 (0.90, 1.04) | 0.335 |  |
| Coronary heart disease | 1.02 (0.97, 1.07) | 0.389 | 1.02 (0.94, 1.09) | 0.686 | 1.03 (0.96, 1.1) | 0.391 |  |
| Hypertonus | 1.05 (0.99, 1.1) | 0.093 | 1.03 (0.94, 1.12) | 0.549 | 1.06 (0.99, 1.14) | 0.095 |  |
| Atherosclerosis | 1.00 (0.95, 1.05) | 0.886 | 0.96 (0.89, 1.04) | 0.341 | 1.02 (0.95, 1.09) | 0.524 |  |
| Chronic kidney disease | 1.02 (0.97, 1.07) | 0.441 | 0.96 (0.89, 1.04) | 0.334 | 1.07 (1.00, 1.14) | 0.06 |  |
| Any anticoagulant | 0.95 (0.91, 1.00) | 0.061 | 0.96 (0.89, 1.04) | 0.298 | 0.95 (0.89, 1.02) | 0.146 |  |
| Vitamin D or Calcium | 1.06 (0.9, 1.24) | 0.487 | 1.06 (0.82, 1.35) | 0.669 | 1.05 (0.86, 1.29) | 0.625 |  |
| Bisphosphonate | 1.04 (0.89, 1.22) | 0.606 | 0.93 (0.73, 1.19) | 0.567 | 1.13 (0.92, 1.38) | 0.252 |  |
| Osteoporosis | 1.10 (1.06, 1.15) | < 0.001 | 1.08 (1.01, 1.15) | 0.024 | 1.12 (1.06, 1.19) | < 0.001 |  |
| Any osteoporosis medication | 0.97 (0.82, 1.16) | 0.763 | 1 (0.76, 1.32) | 0.994 | 0.96 (0.76, 1.21) | 0.75 |  |
| Outpatient sector | 0.94 (0.9, 0.98) | 0.006 | 1.19 (0.75, 1.9) | 0.458 | 0.99 (0.94, 1.05) | 0.841 |  |
| Treatment change within 21 days after diagnosis | 1.64 (1.48, 1.81) | < 0.001 | 1.6 (1.44, 1.77) | < 0.001 |  |  |  |
| Thromboembolic event within 21 days after diagnosis | 3.04 (0.97, 9.52) | 0.056 | 5.94 (0.57, 61.47) | 0.135 | 2.6 (0.72, 9.42) | 0.146 |  |
| Injury-related event within 21 days after diagnosis | 3.2 (2.96, 3.47) | < 0.001 | 2.53 (2.19, 2.93) | < 0.001 | 3.72 (3.37, 4.11) | < 0.001 |  |
| Major adverse event within 21 days after diagnosis | 0.45 (0.18, 1.1) | 0.081 | 0.21 (0.02, 2.21) | 0.196 | 0.56 (0.21, 1.48) | 0.239 |  |
| Minor outpatient event within 21 days after diagnosis | 2.99 (2.8, 3.19) | < 0.001 | 2.88 (2.49, 3.32) | < 0.001 | 3.13 (2.91, 3.38) | < 0.001 |  |

**References:**

1. Katthagen JC, Raschke MJ, Fischhuber K, Iking J, Marschall U, Sussiek J, et al. Conservative Versus Operative Treatment of Proximal Humerus Fractures in Older Individuals—an Analysis of Insurance Data. Dtsch Arzteblatt Int. 2024 Jun 28;(Forthcoming):arztebl.m2024.0059.

2. Koeppe J, Stolberg-Stolberg J, Rischen R, Freistuehler M, Faldum A, Raschke MJ, et al. Increased complication rates of salvage reverse total shoulder arthroplasty (RTSA) after failed locked plate fixation compared with primary RTSA in the treatment of proximal humeral fractures in elderly patients. J Shoulder Elbow Surg. 2023 Aug;32(8):1574–83.

3. Abgrenzungskriterien der Geriatrie - Version V1.3.

1. These codes were only collected if they were coded within 3 months prior to the index event. [↑](#footnote-ref-1)
2. Fractures (codes of the form S-2.-[-]) were only recorded if they were coded within 26 weeks prior to the index event. [↑](#footnote-ref-2)
3. Dialysis requirement is assumed if at least 12 dialyses were coded within 2 years prior to the index event. [↑](#footnote-ref-3)
